# Supplementary material for: Identification of Novel Imprinted Differentially Methylated Regions by Global Analysis of Human-Parthenogenetic-Induced Pluripotent Stem Cells
Source: PubMed Central journal article supplement — Stem Cell Reports. 2013 Jun 4;1(1):79–89. doi: 10.1016/j.stemcr.2013.03.005 (PMC3757747; doi:10.1016/j.stemcr.2013.03.005), 2013-06-04
Supplement: mmc1.pdf [file mmc1.pdf]

# **Stem Cell Reports, Volume 1**

## **Supplemental Information**

### **Identification of Imprinted Differentially**

### **Methylated Regions by Global Analysis of Human-**

### **Parthenogenetic-Induced Pluripotent Stem Cells**

Yonatan Stelzer, Daniel Ronen, Christoph Bock, Patrick Boyle, Alexander Meissner, and Nissim Benvenisty

## **Supplementary Data Inventory**

### **Figure S1 - related to Figure 1**

Conceptual frame-work and analysis of reduced representation libraries.

### **Figure S2 – related to Figure 1**

Characterization of global methylation profiles and known imprinted DMRs in different cell types.

### **Figure S3 – related to Figure 2 and Table 1**

Regional view of all novel DMRs identified in this study.

### **Figure S4 – related to Figure 3**

Characterization of previously identified imprinted DMRs.

### **Table S1 related to Figure 3**

Expression of genes associated with intragenic DMRs.

### **Table S2 related to Figure 3**

Expression of genes associated with intergenic DMRs.

### **Table S3 related to Figure 4**

Comparison between mouse and human imprinted DMR.

Figure S1

A.

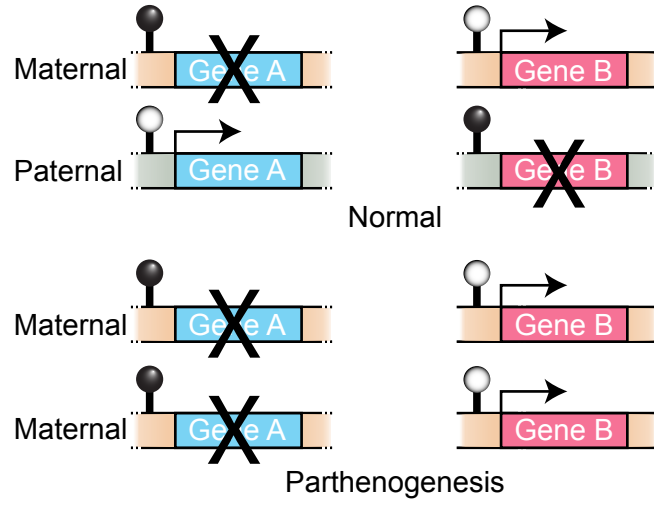

B.

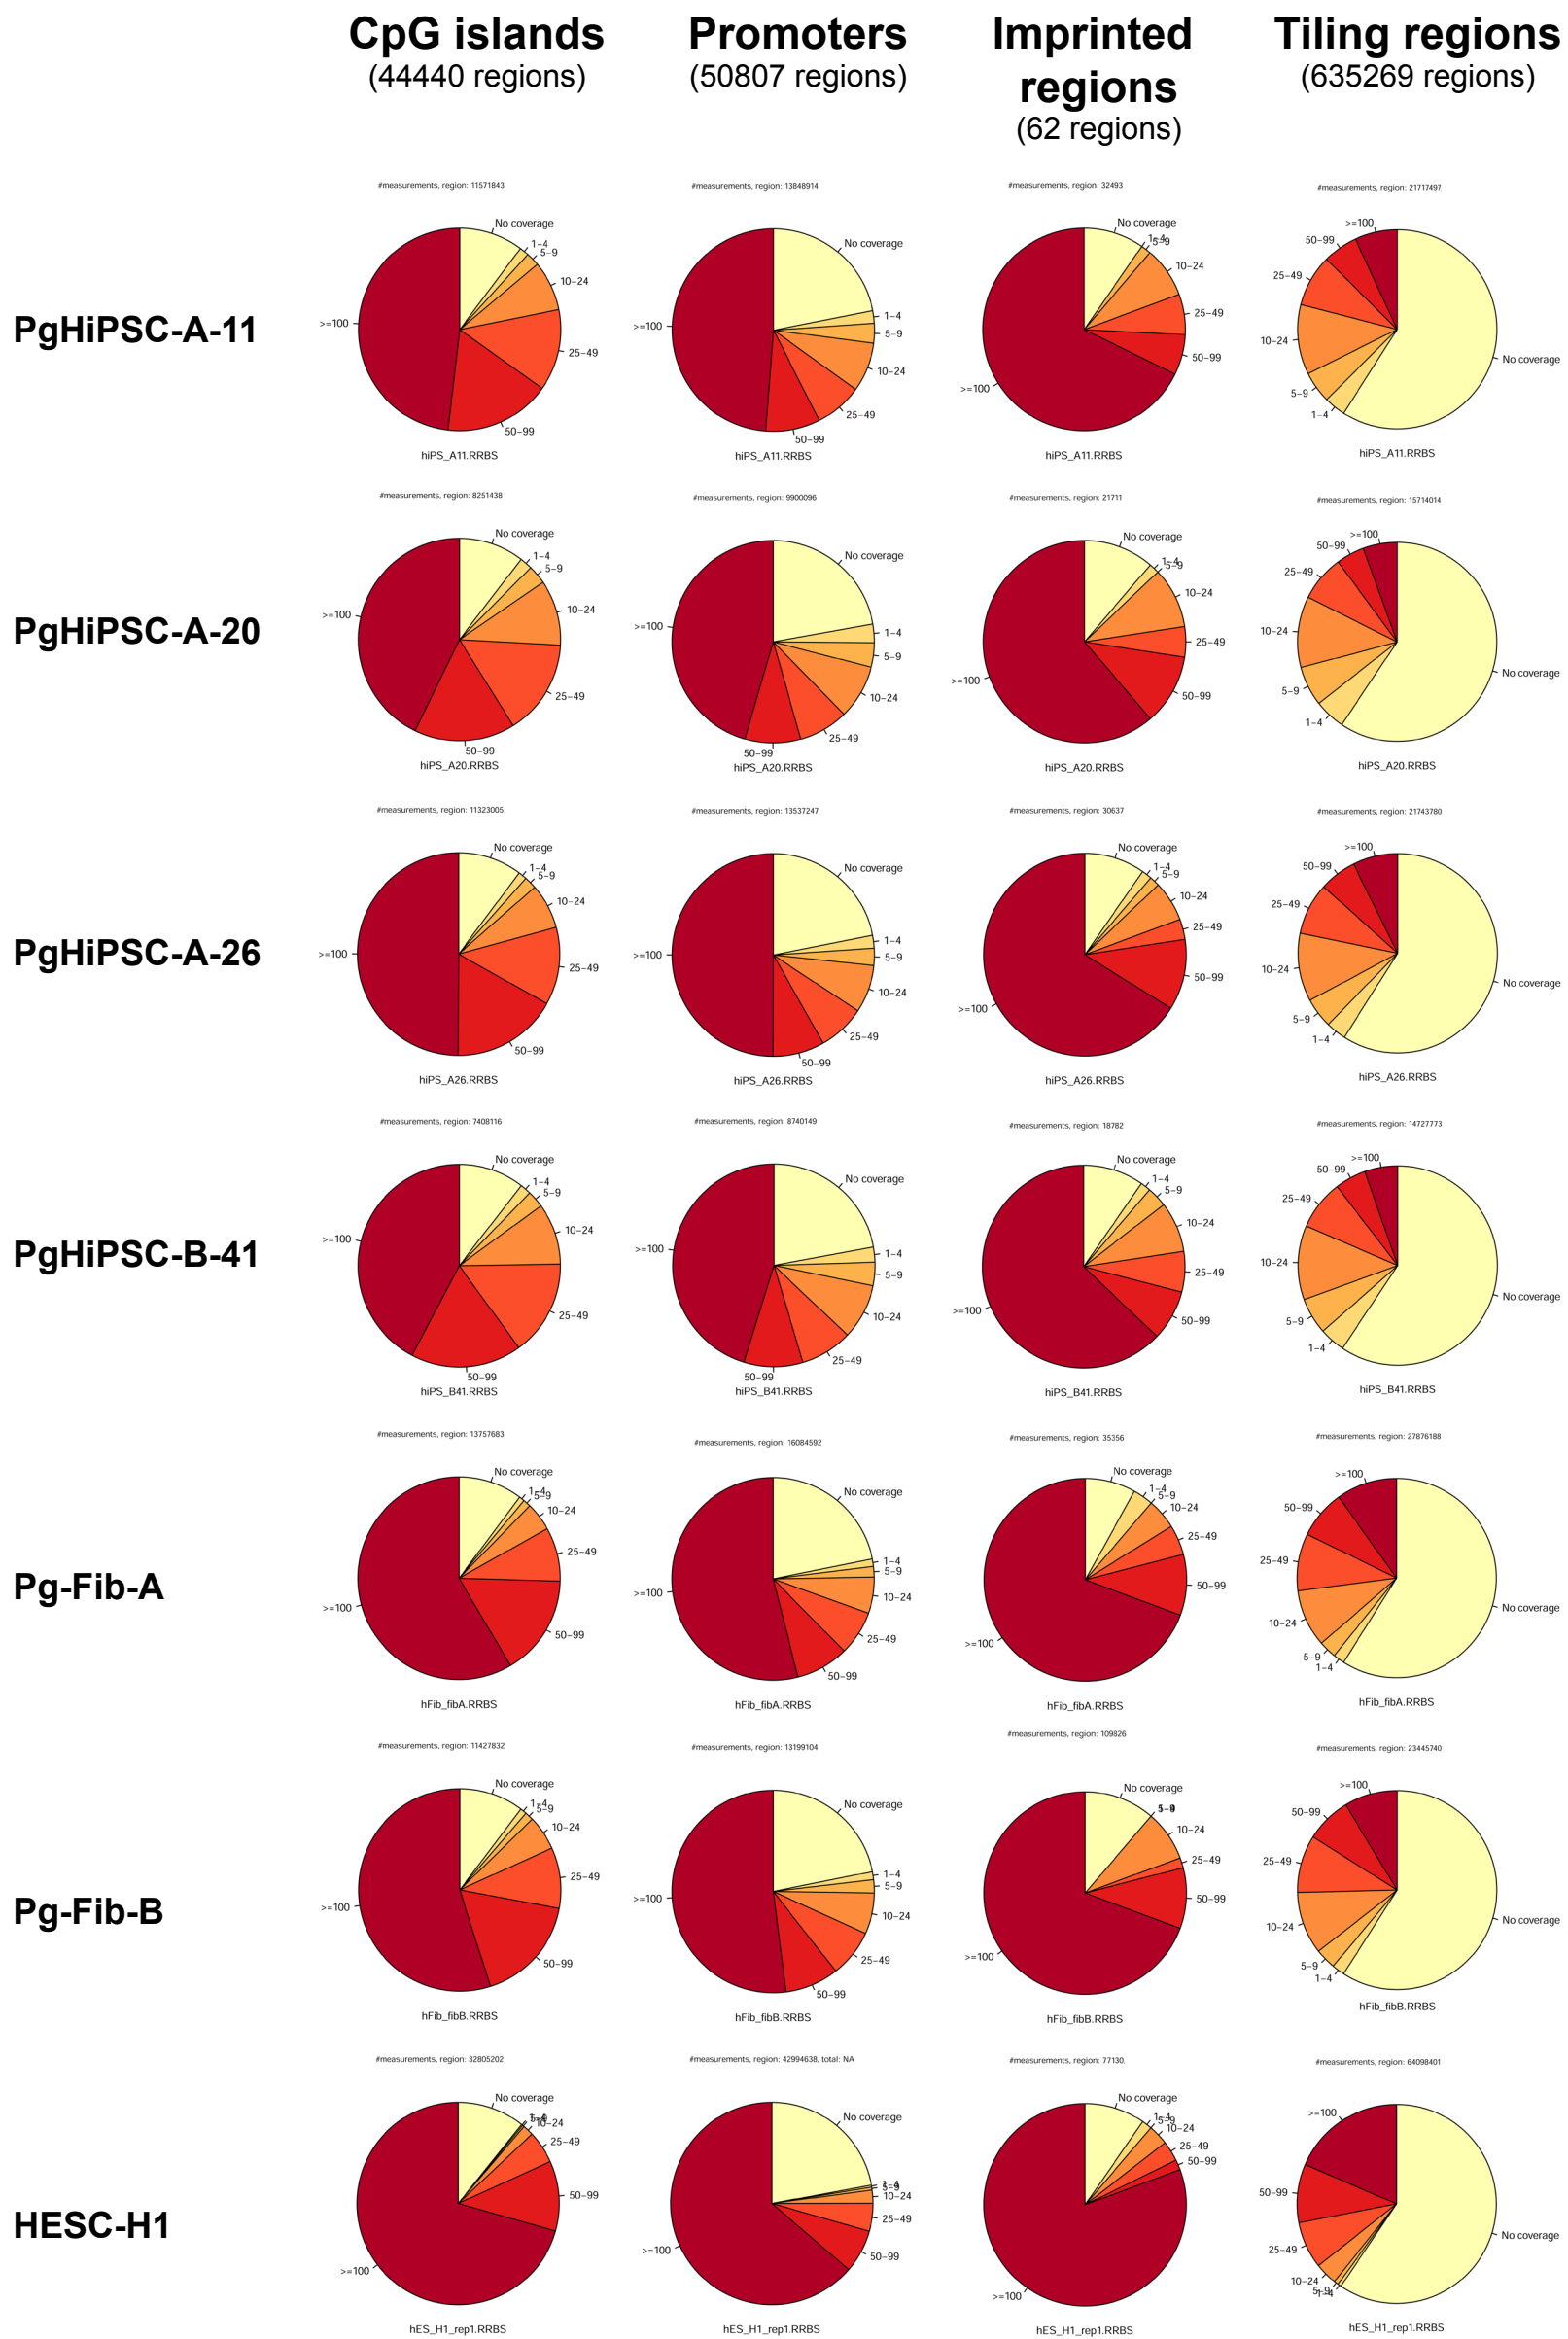

**Figure S2**

**A.**

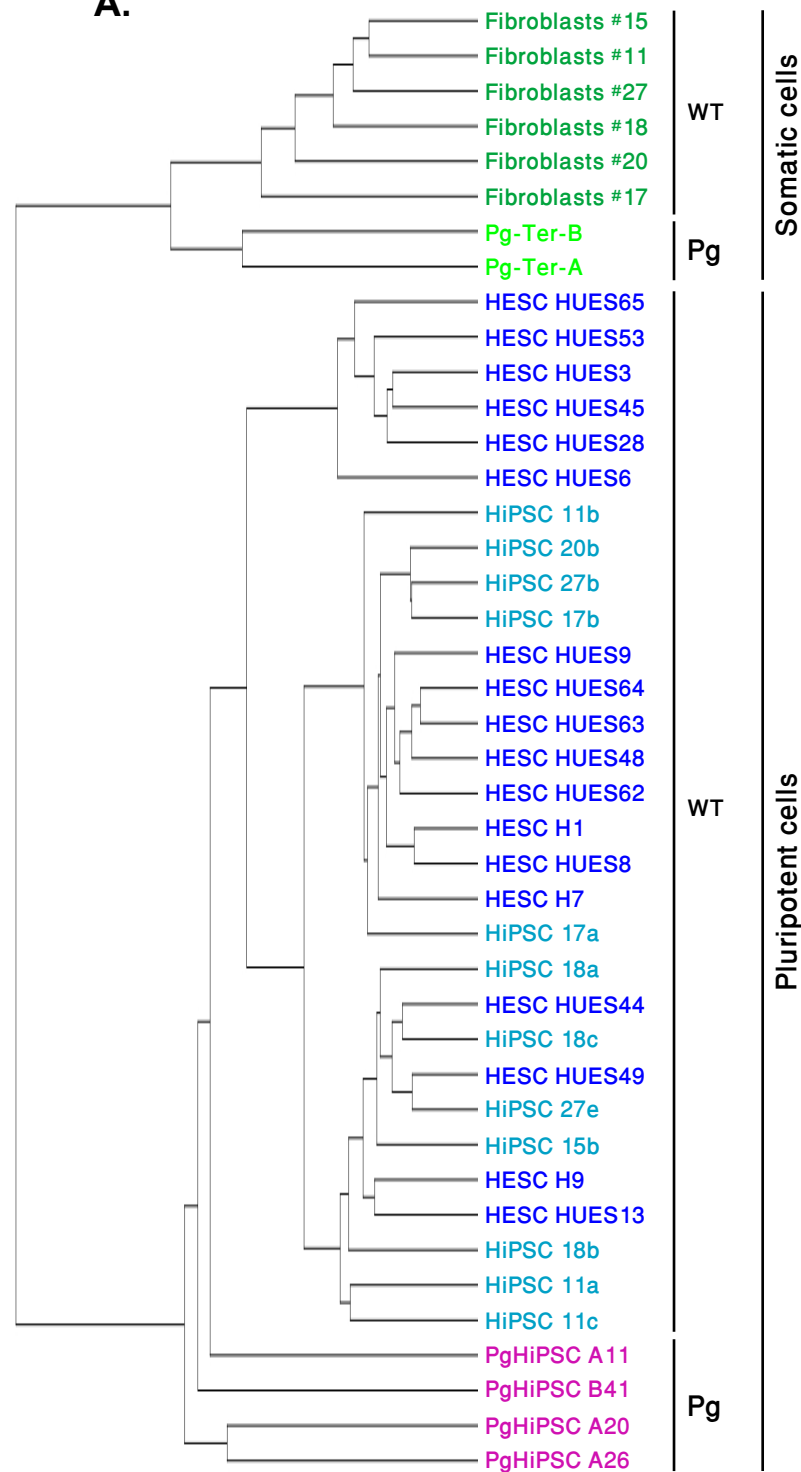

**B.**

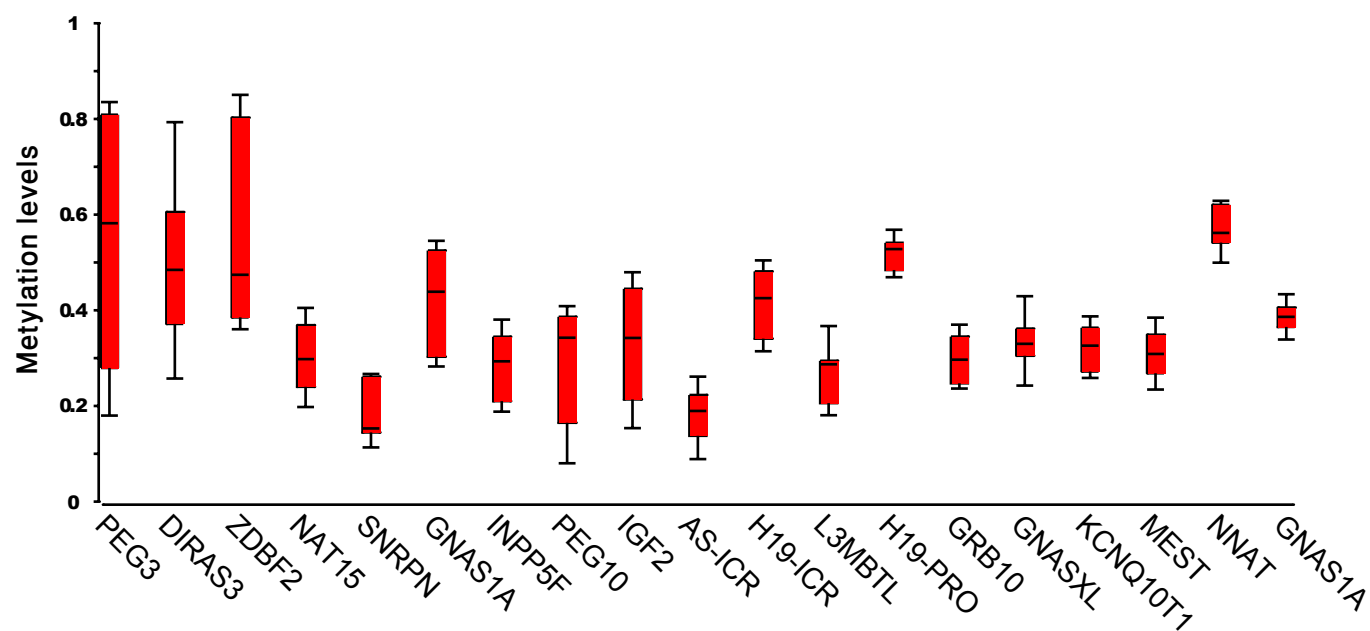

**C.**

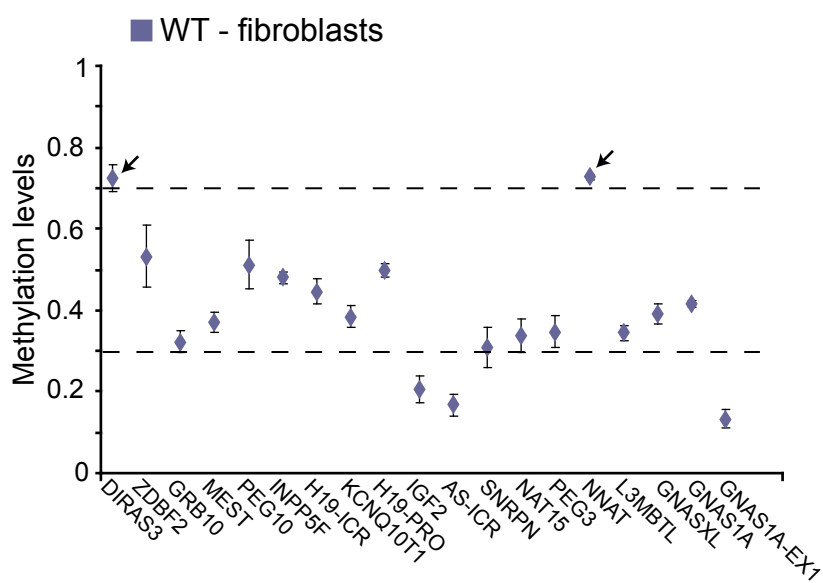

**D.**

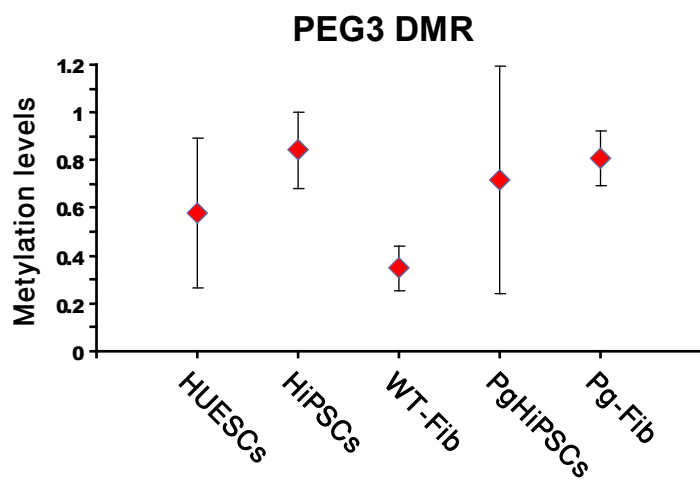

**E.**

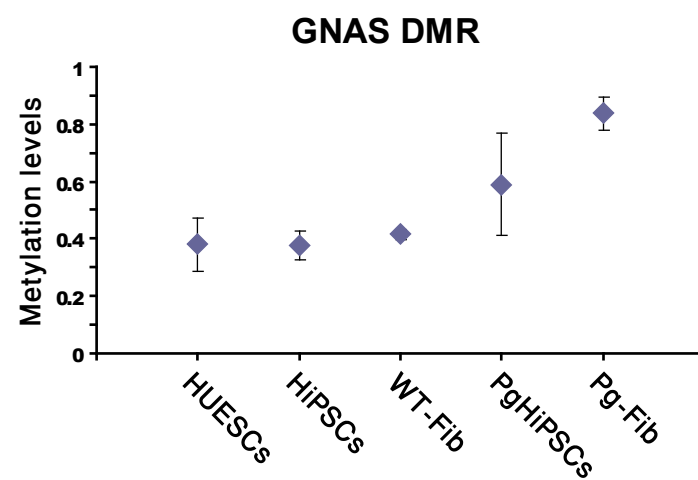

**F.**

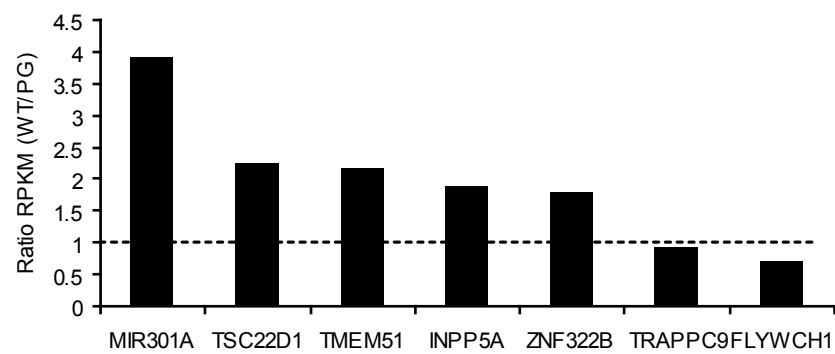

Figure S3

Known regions

Syntenic to mouse

Clustered

Novel regions

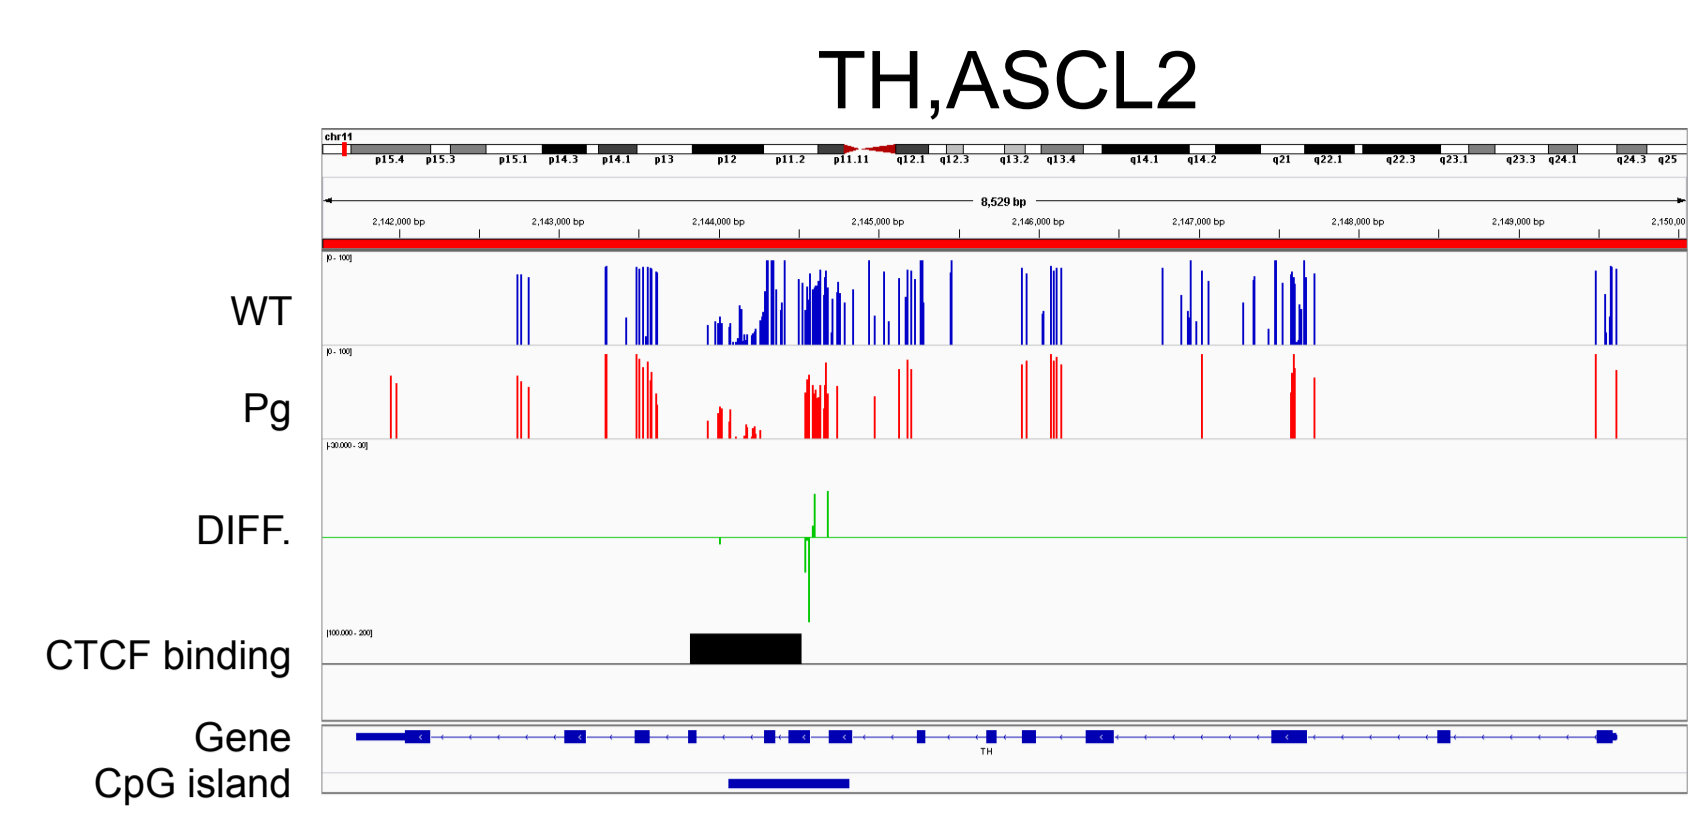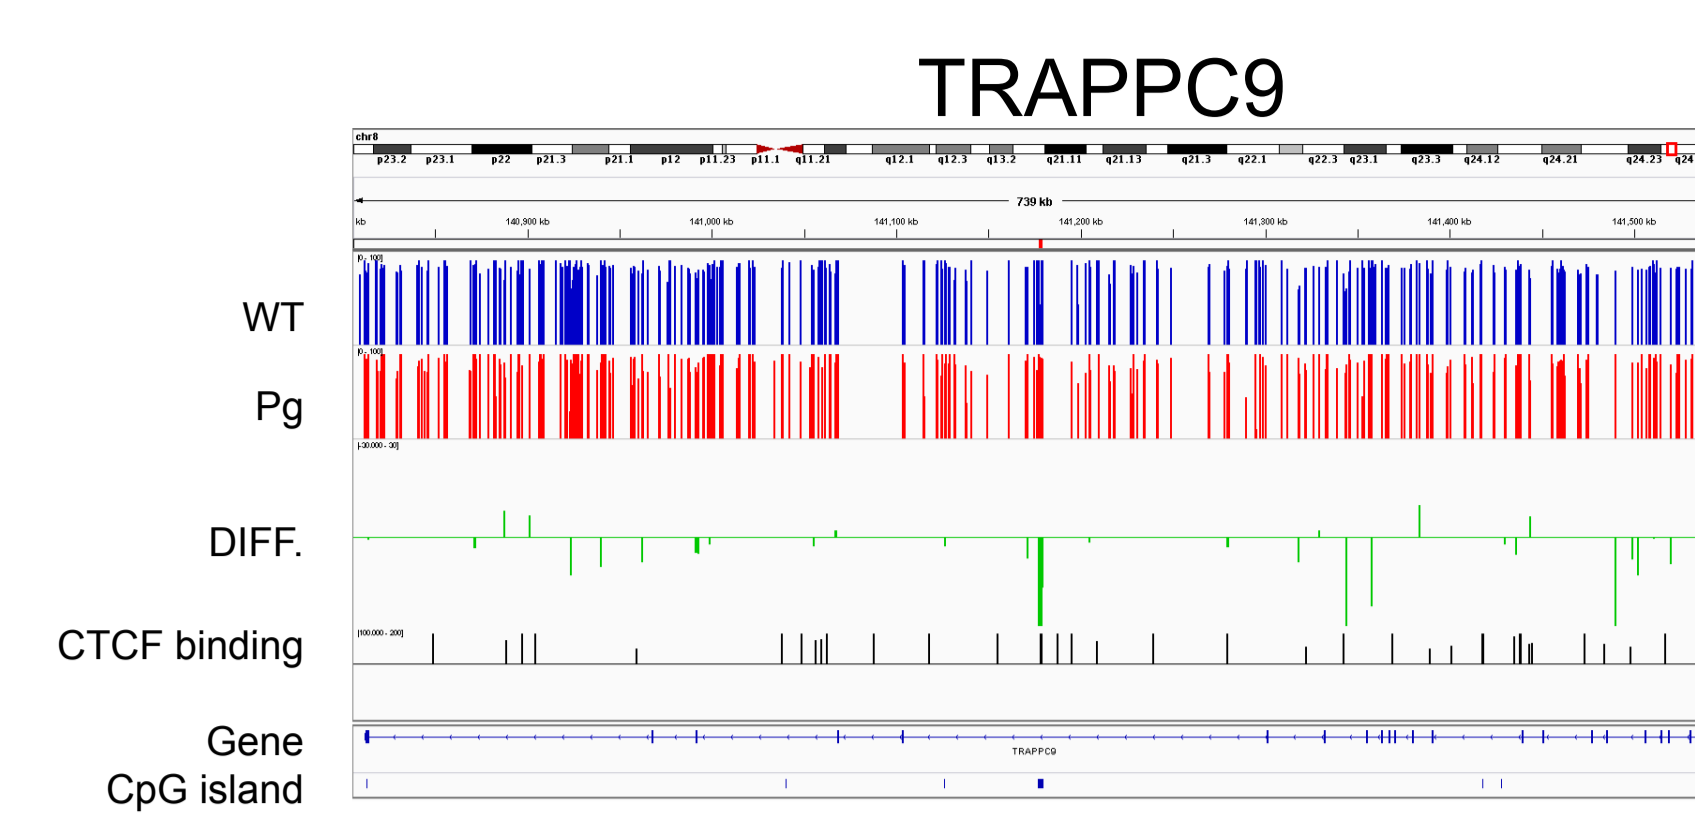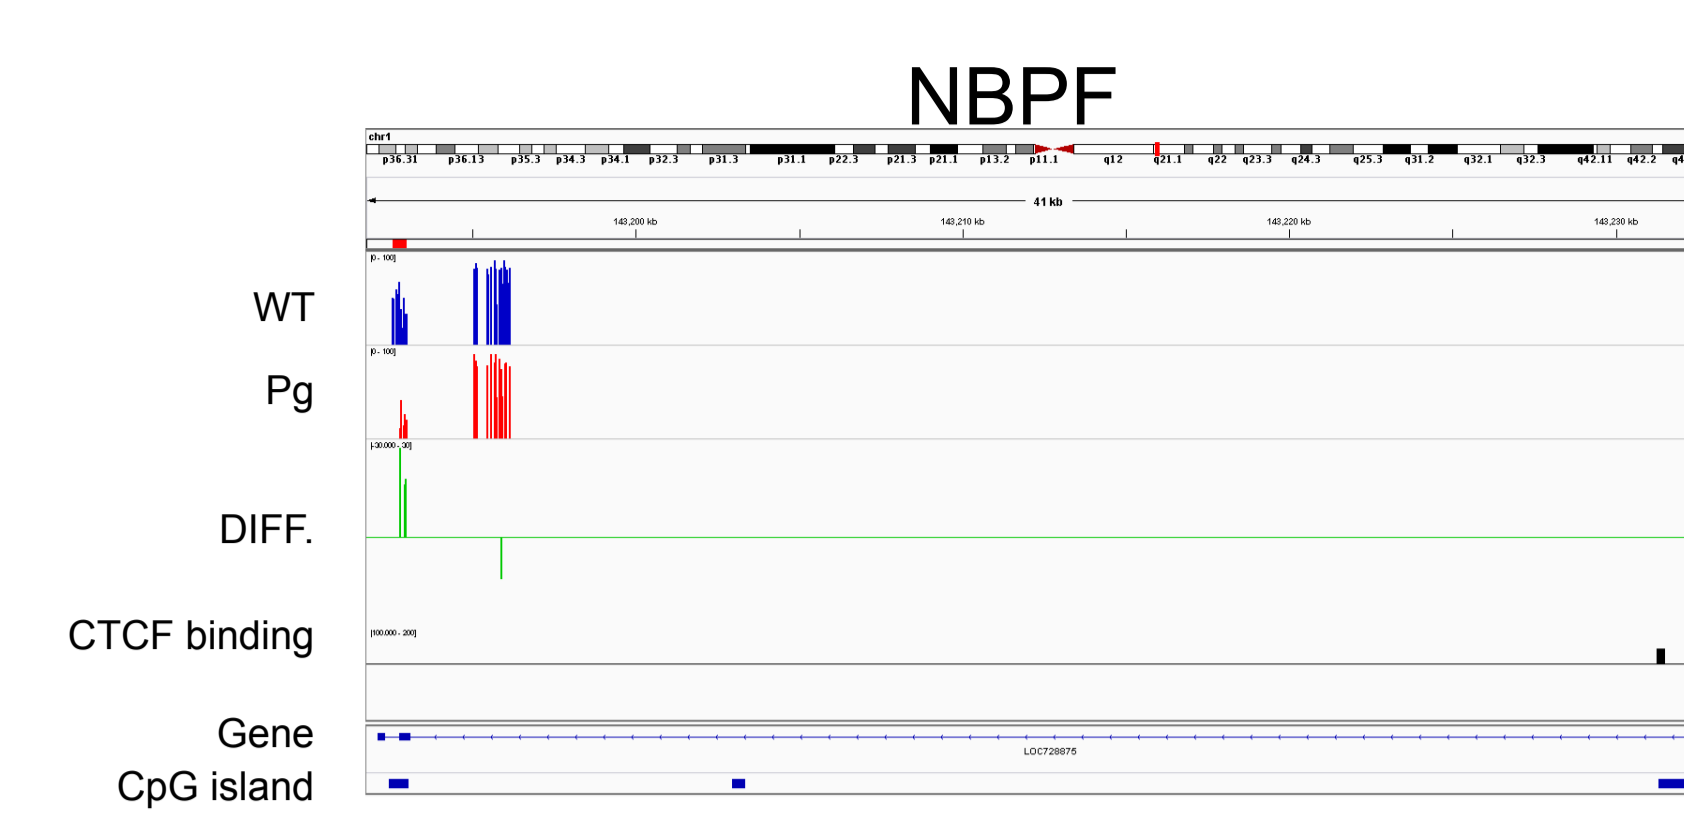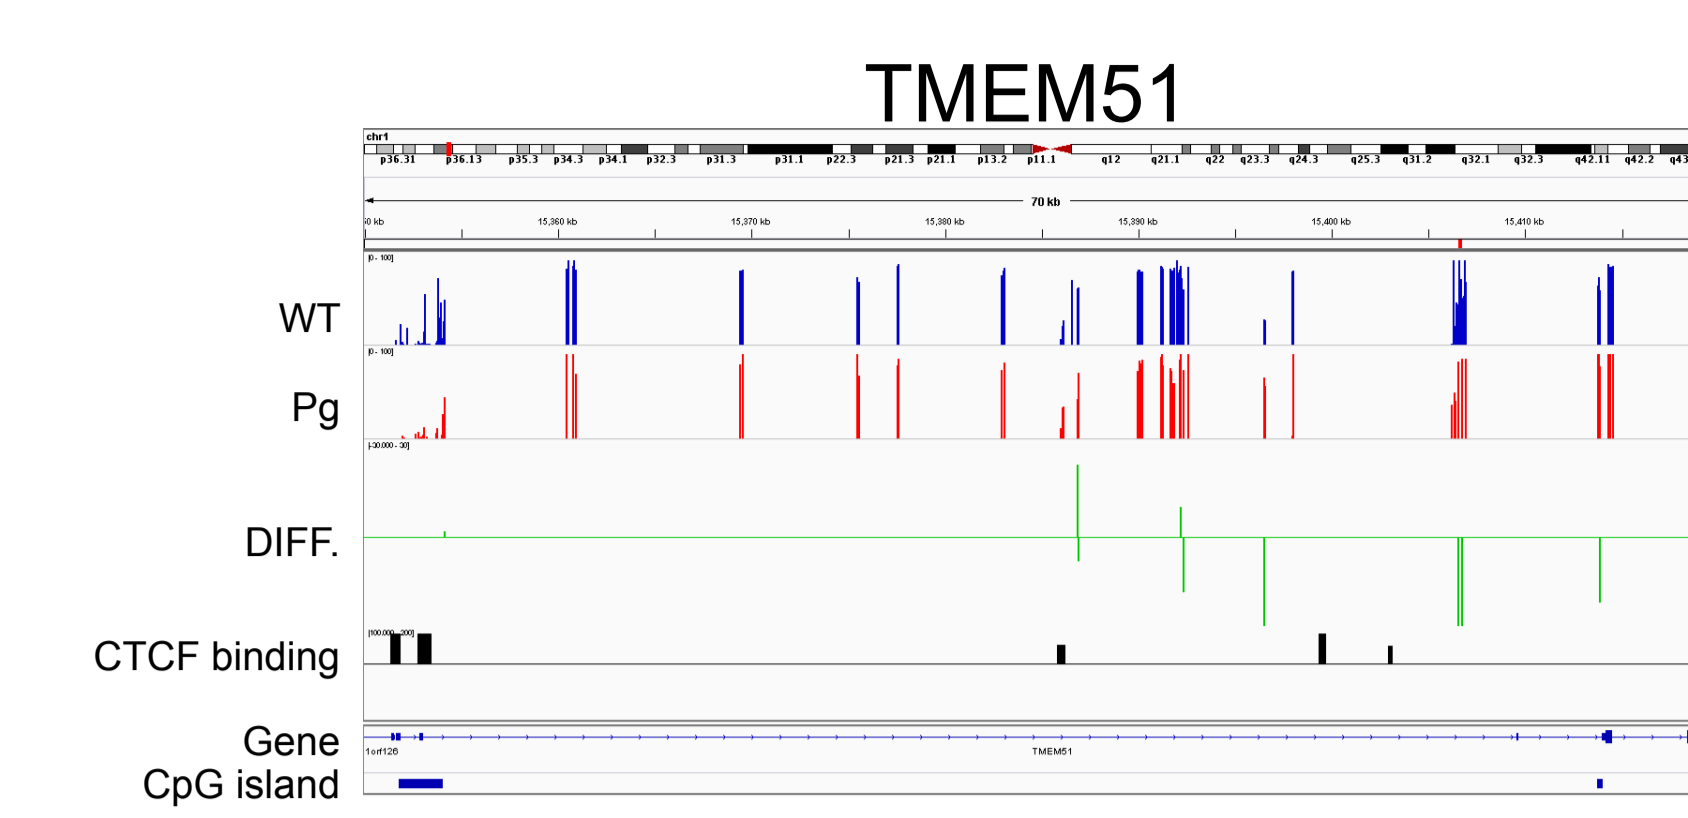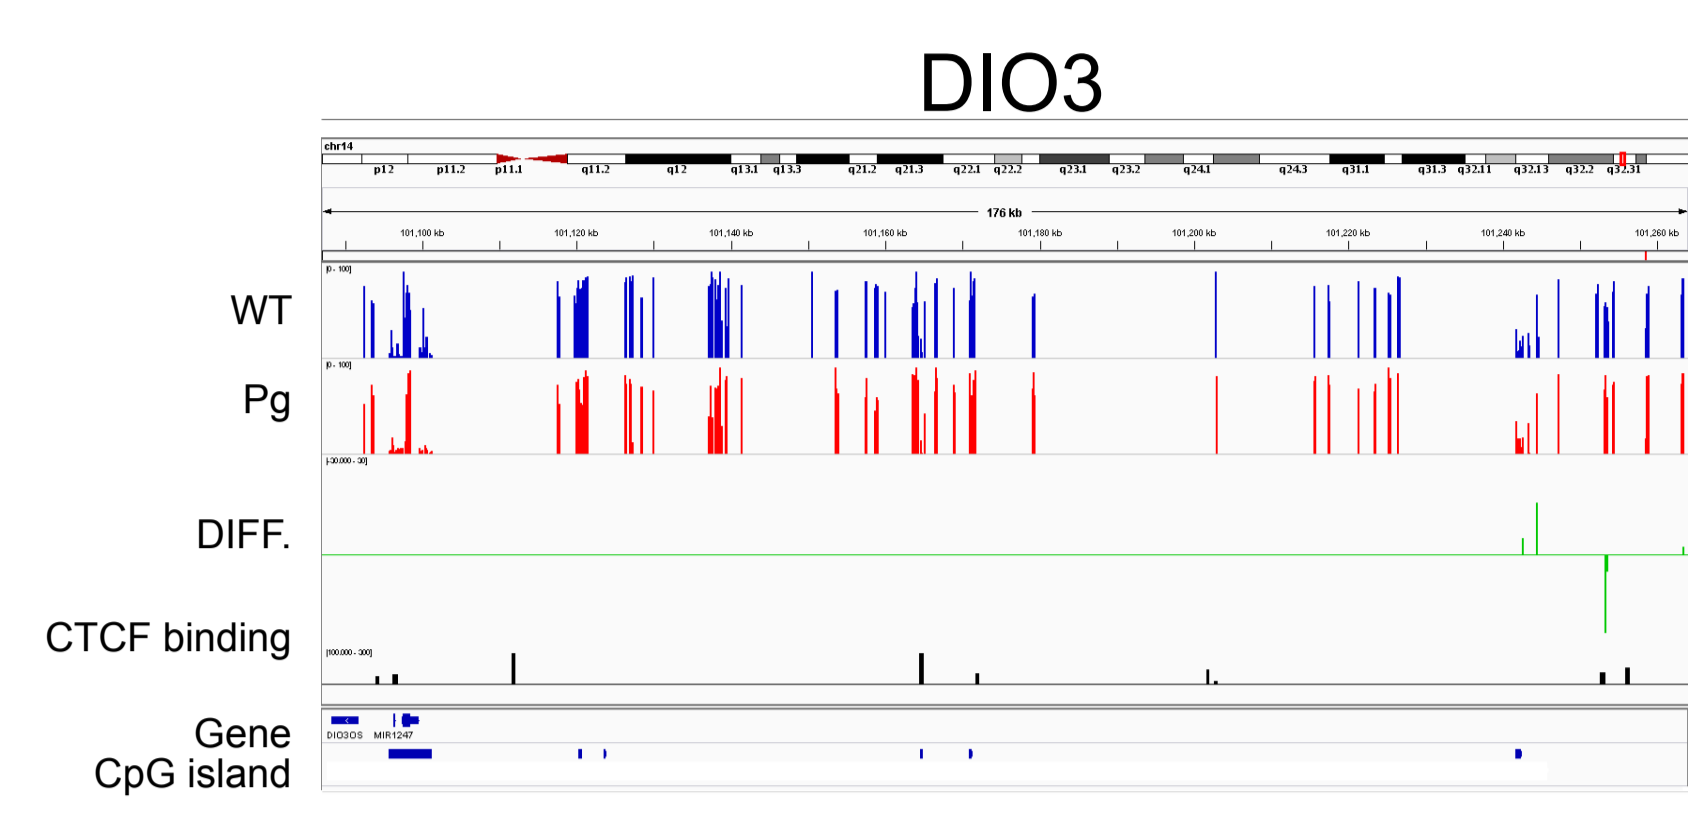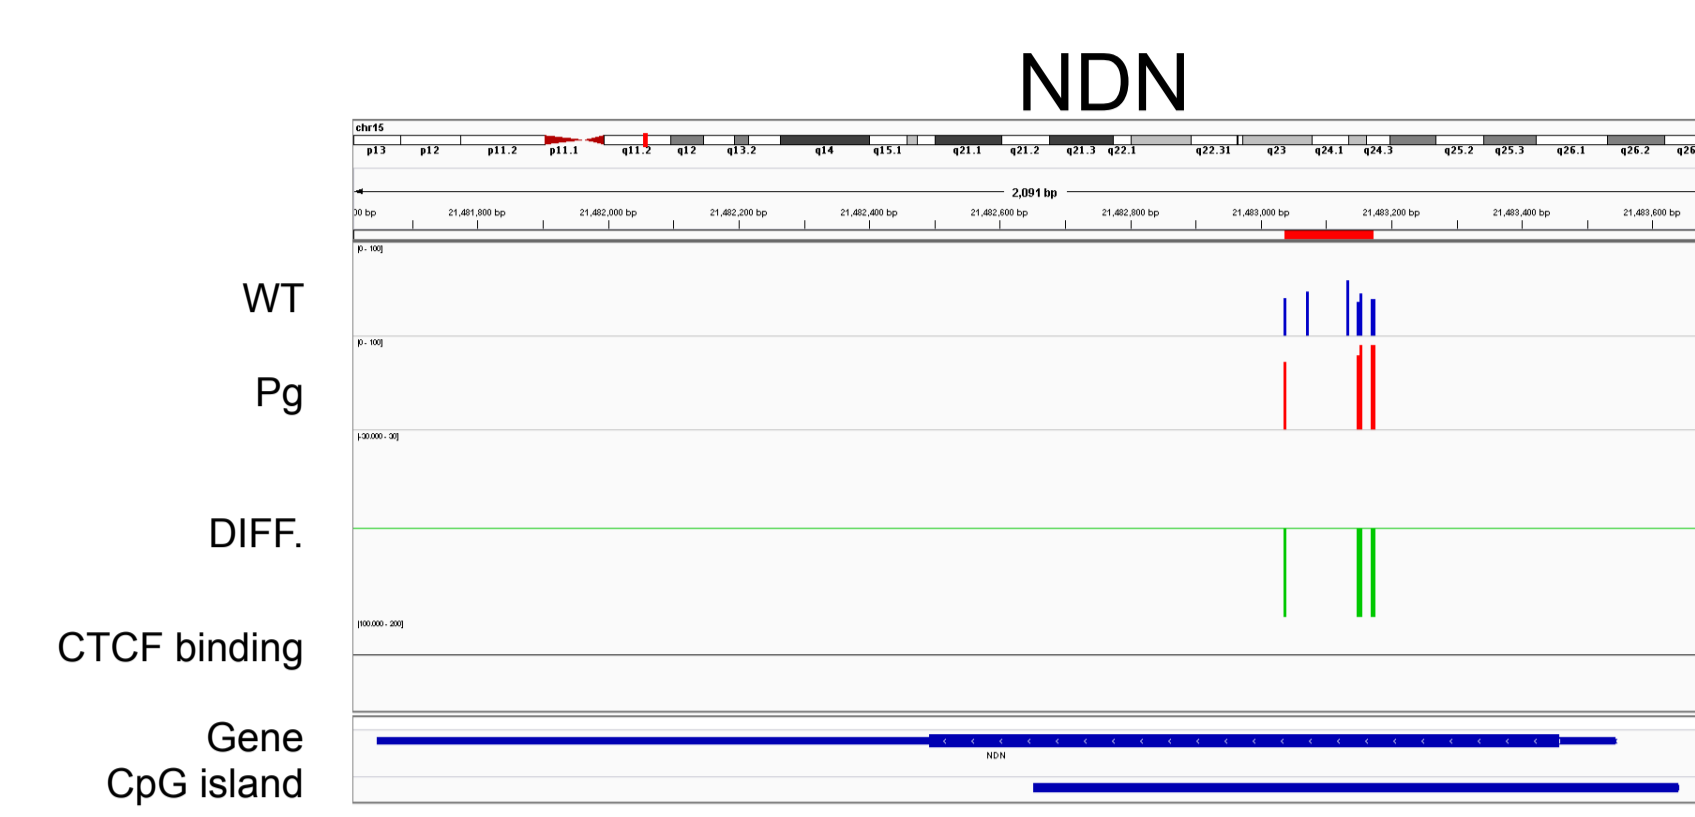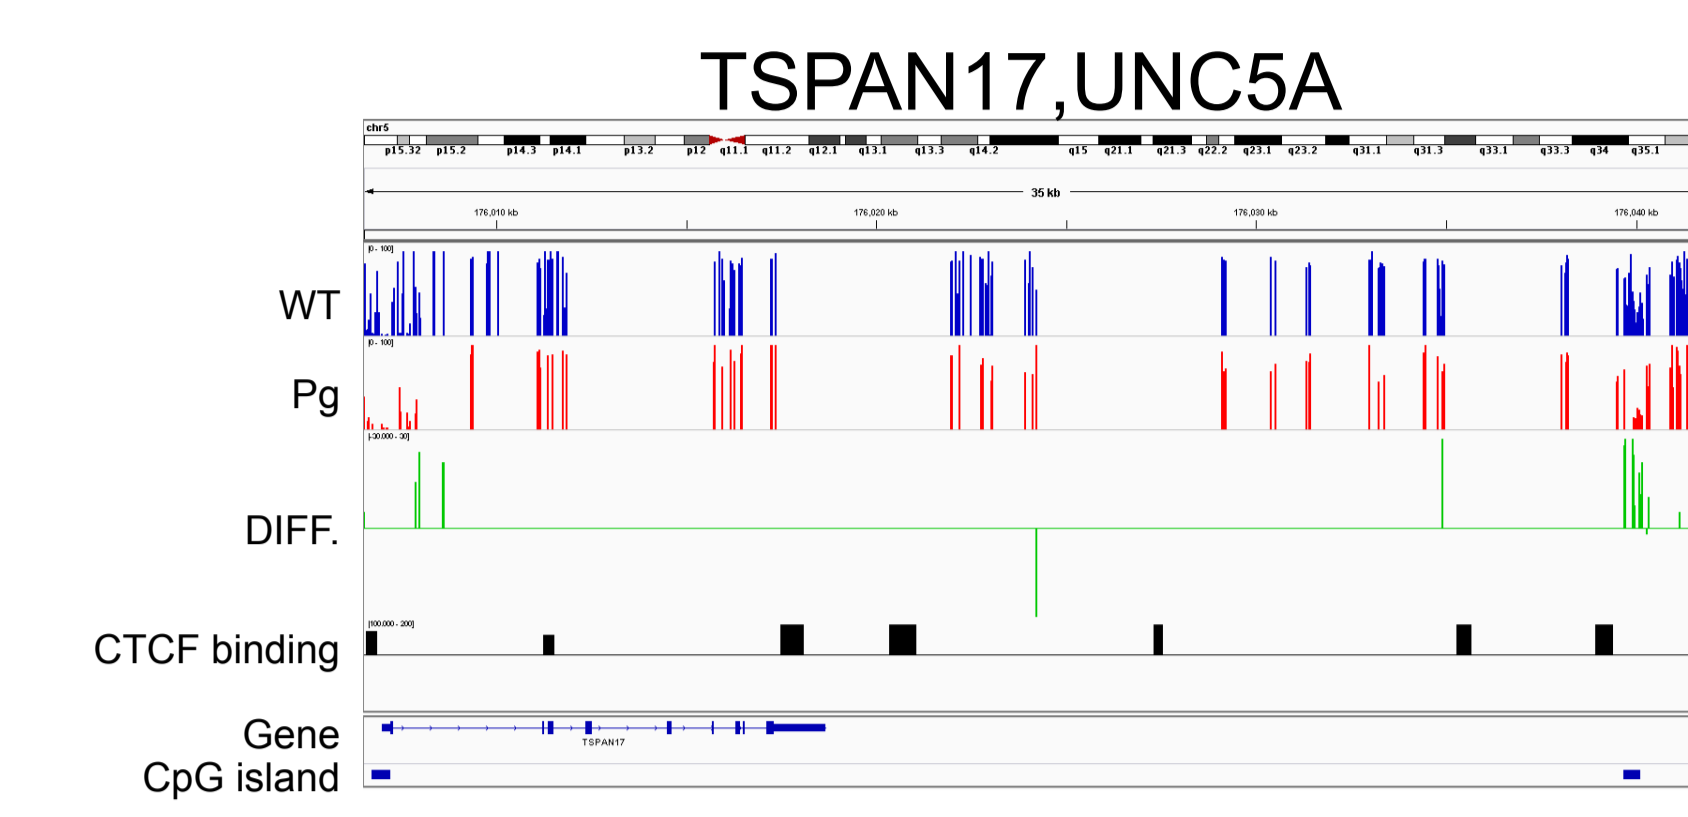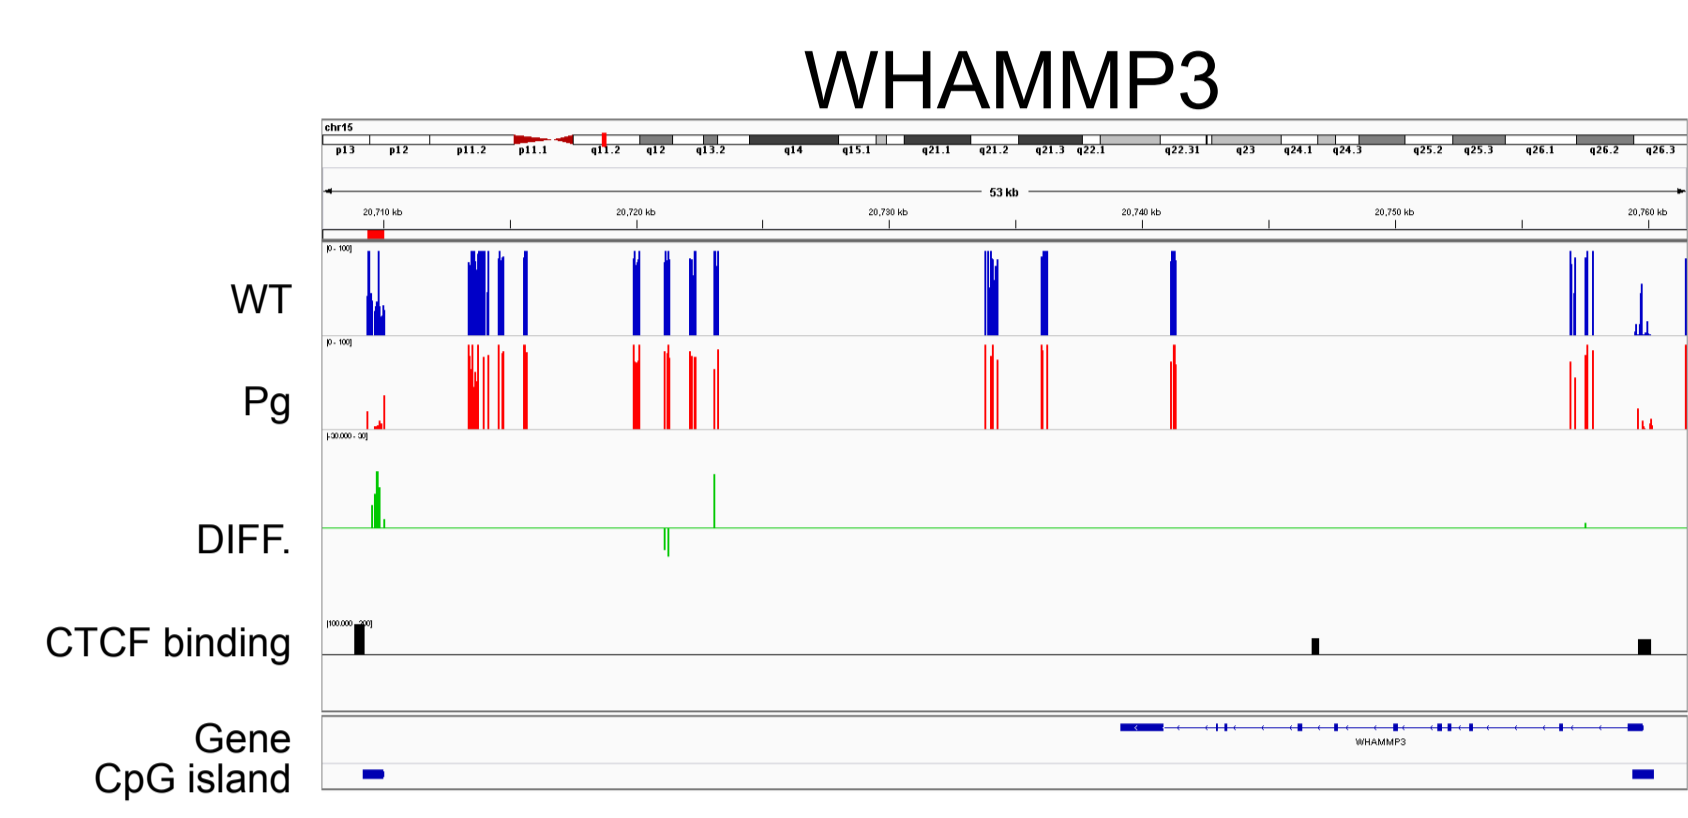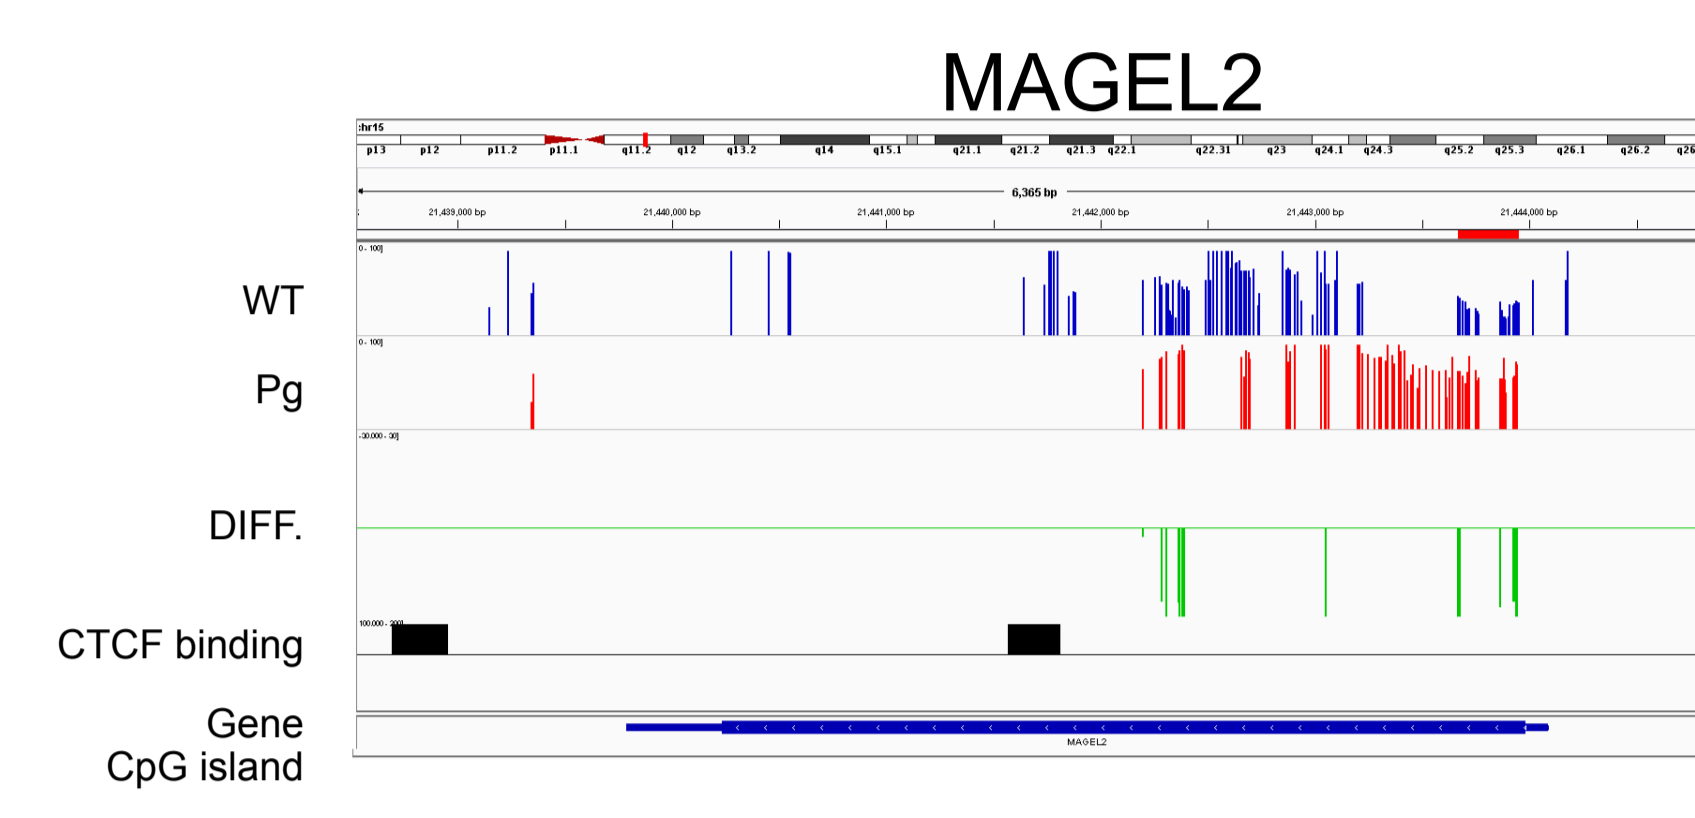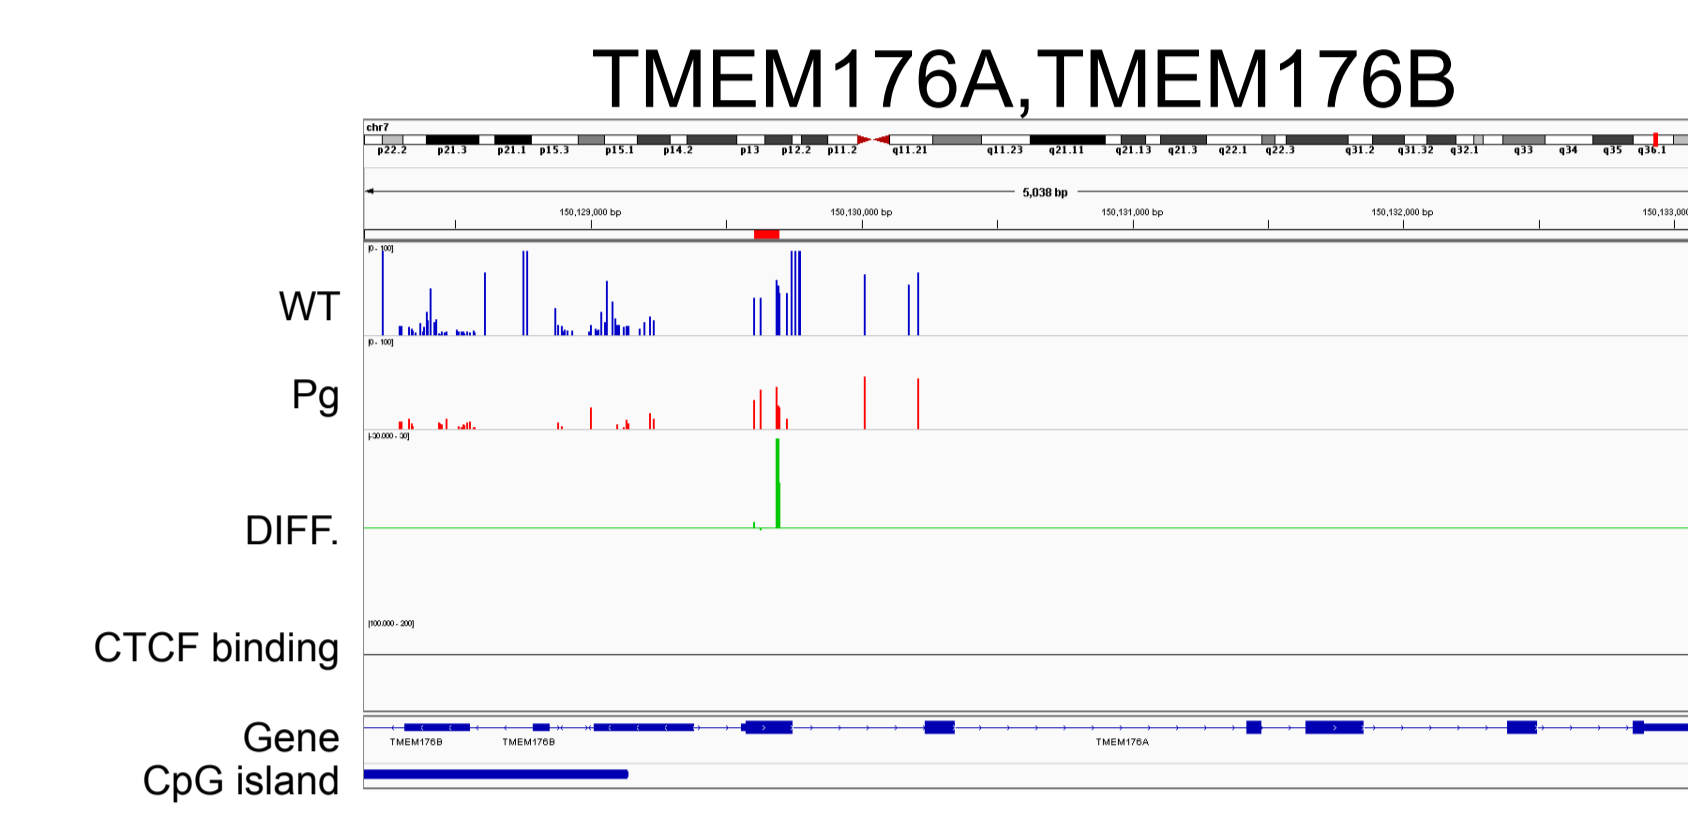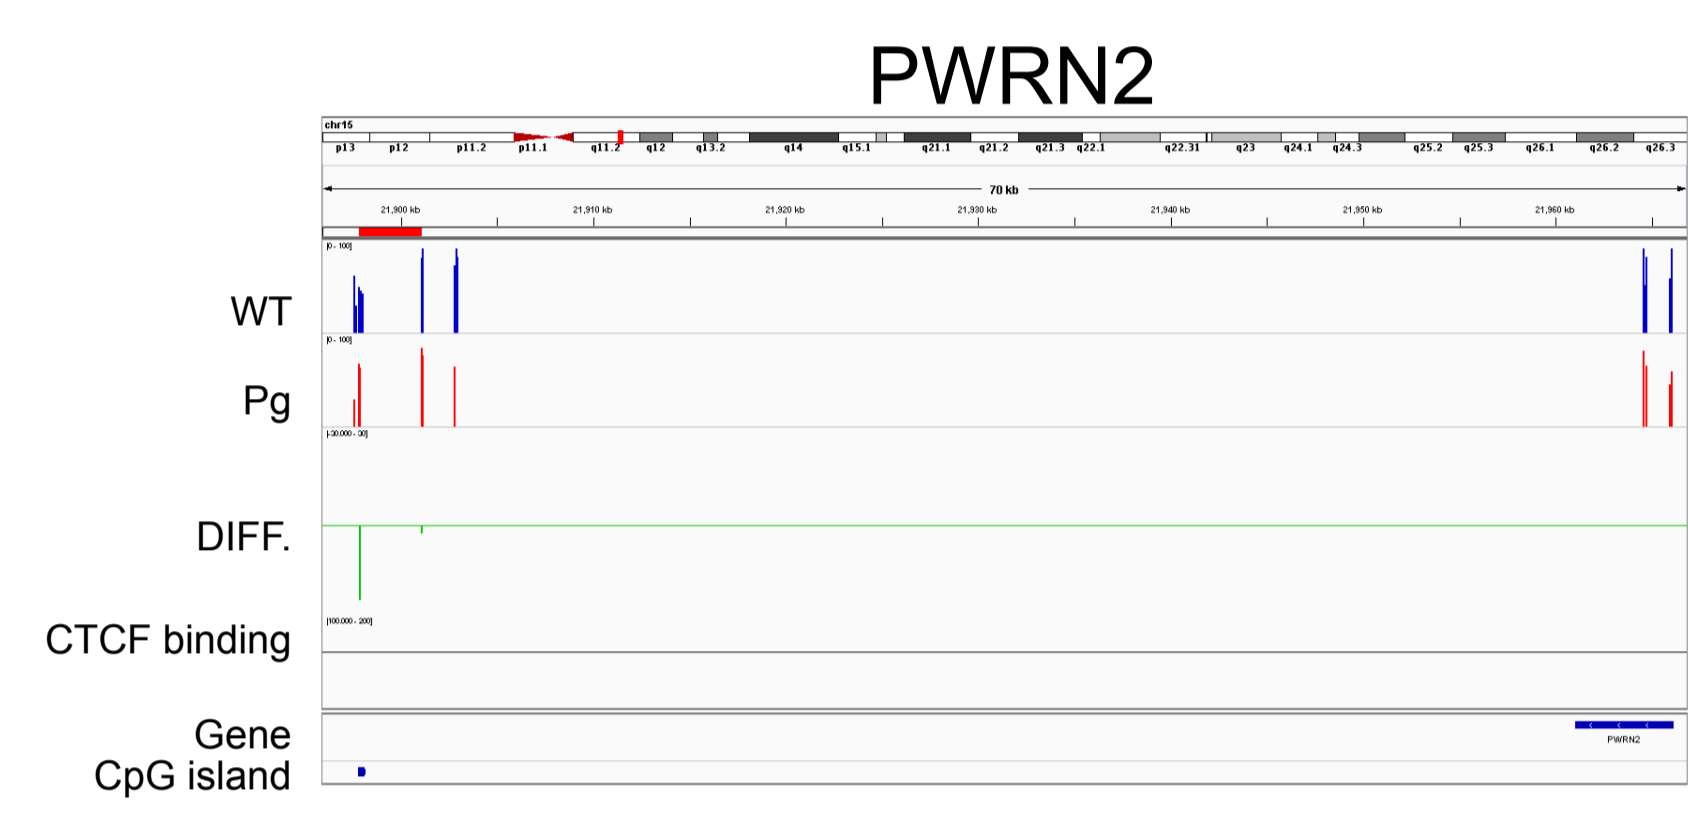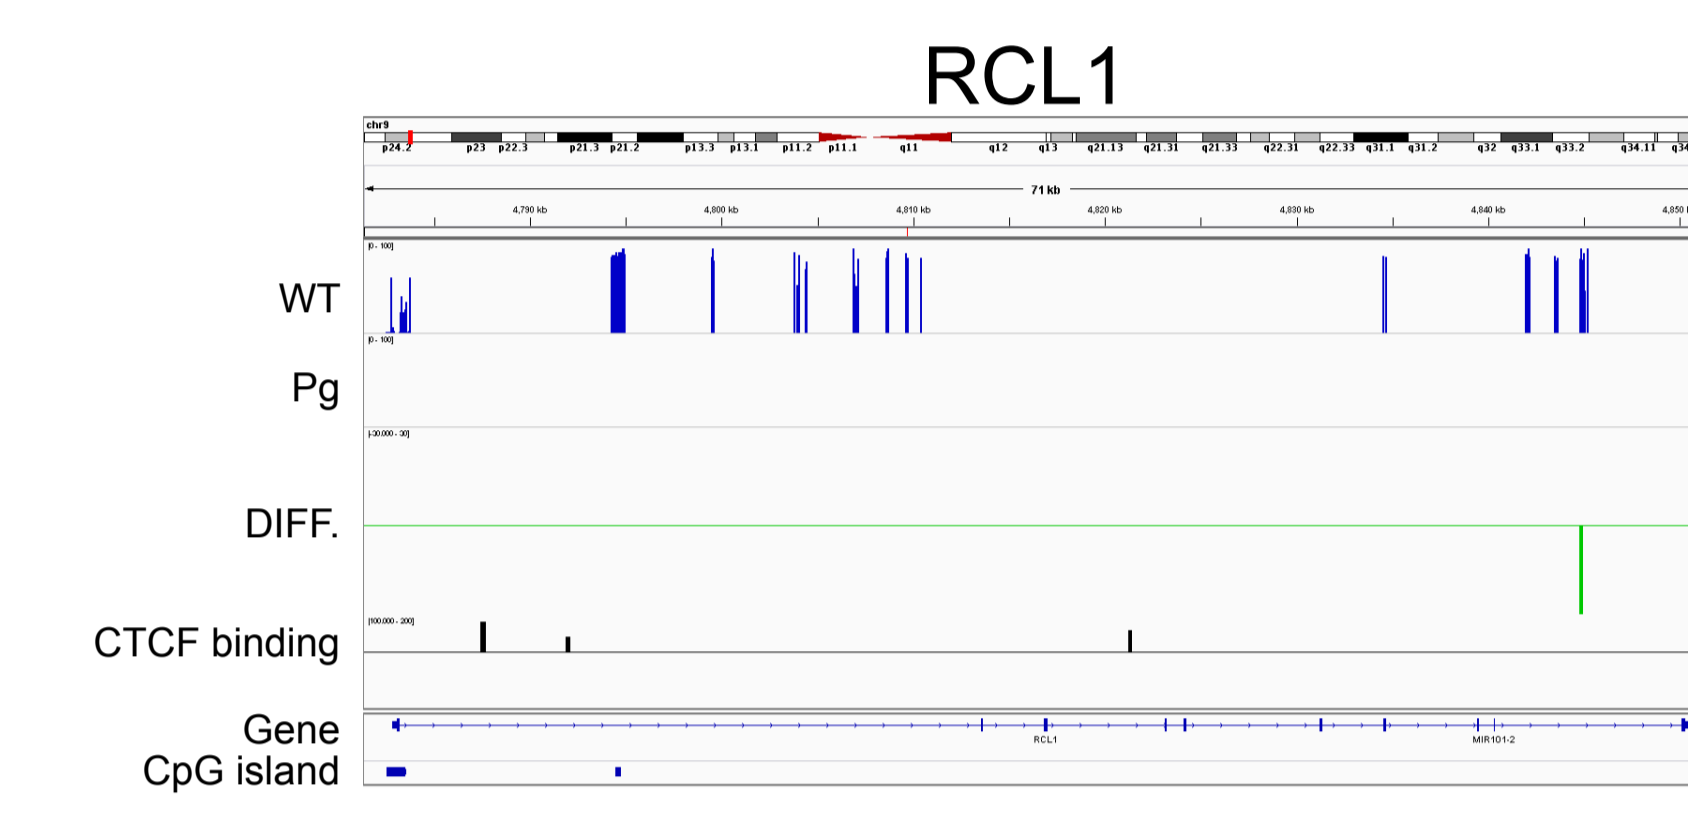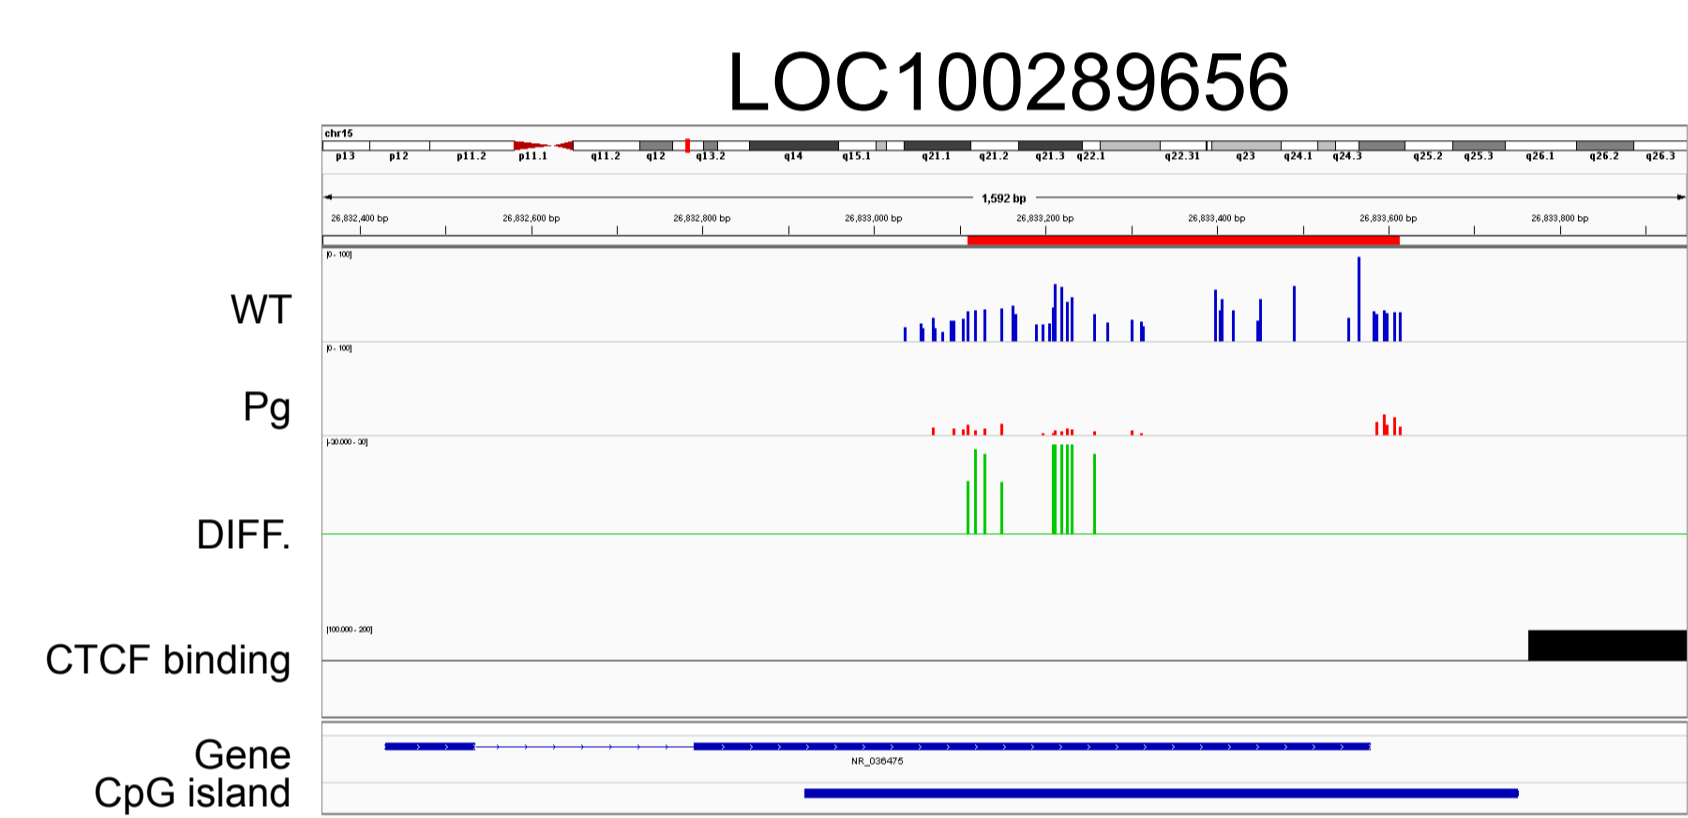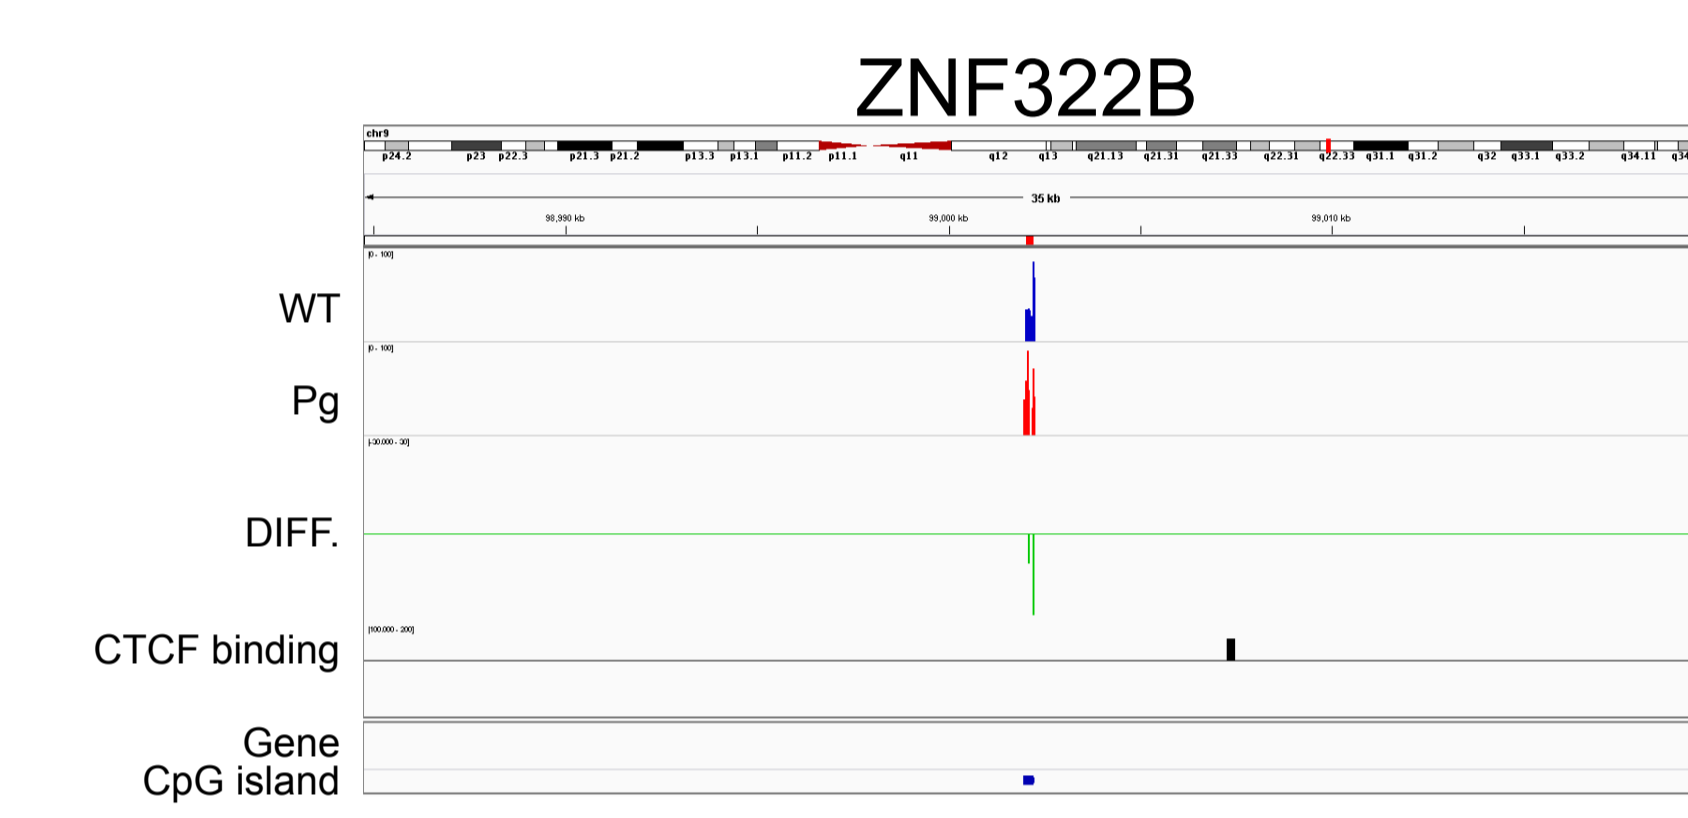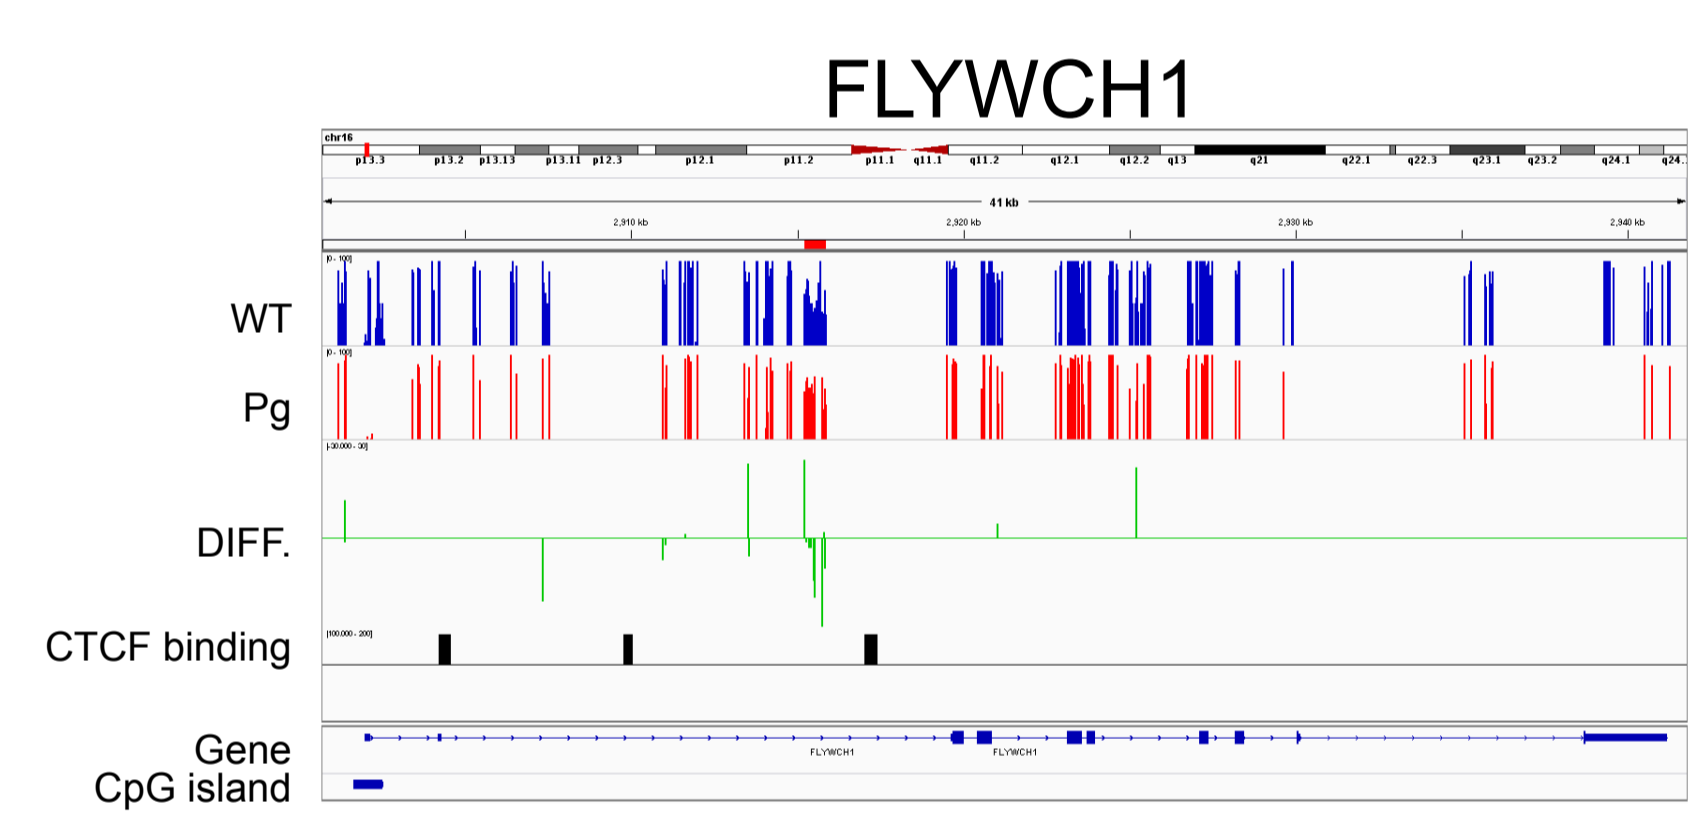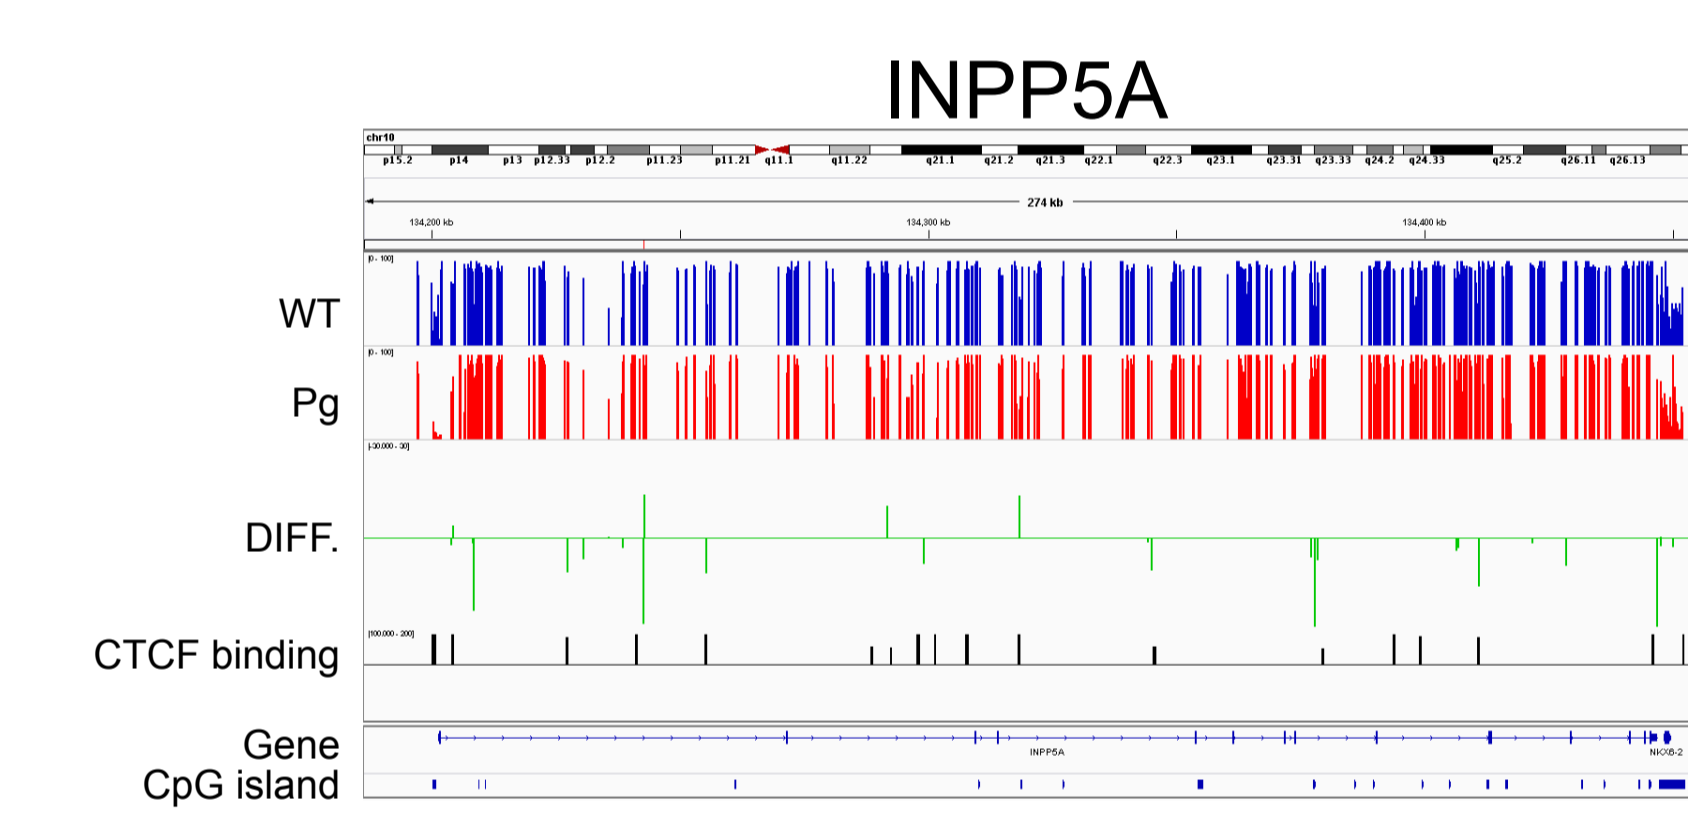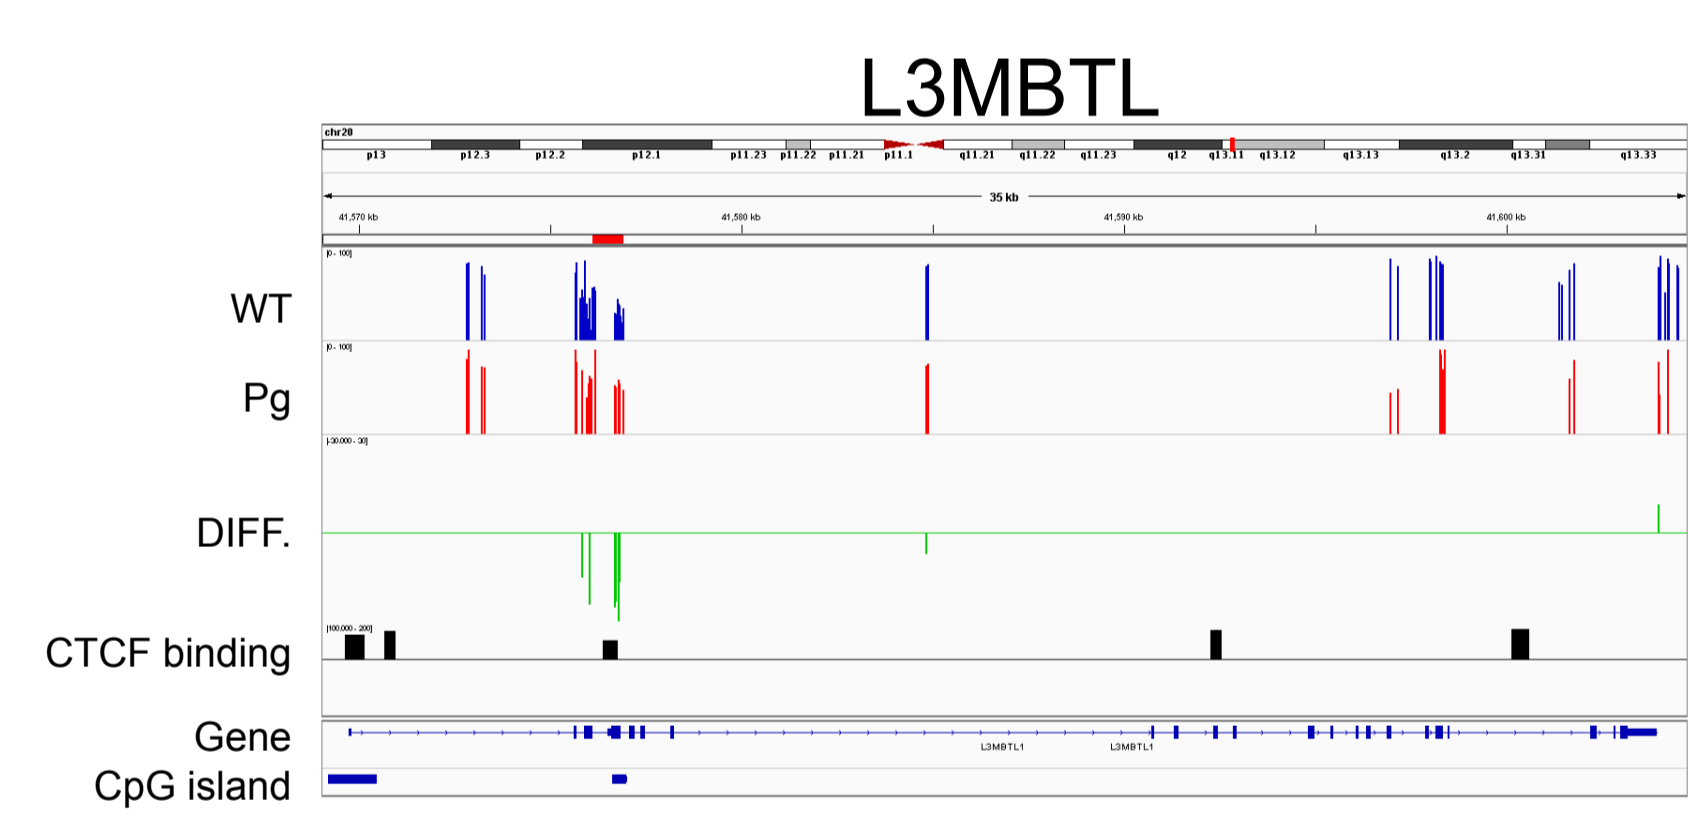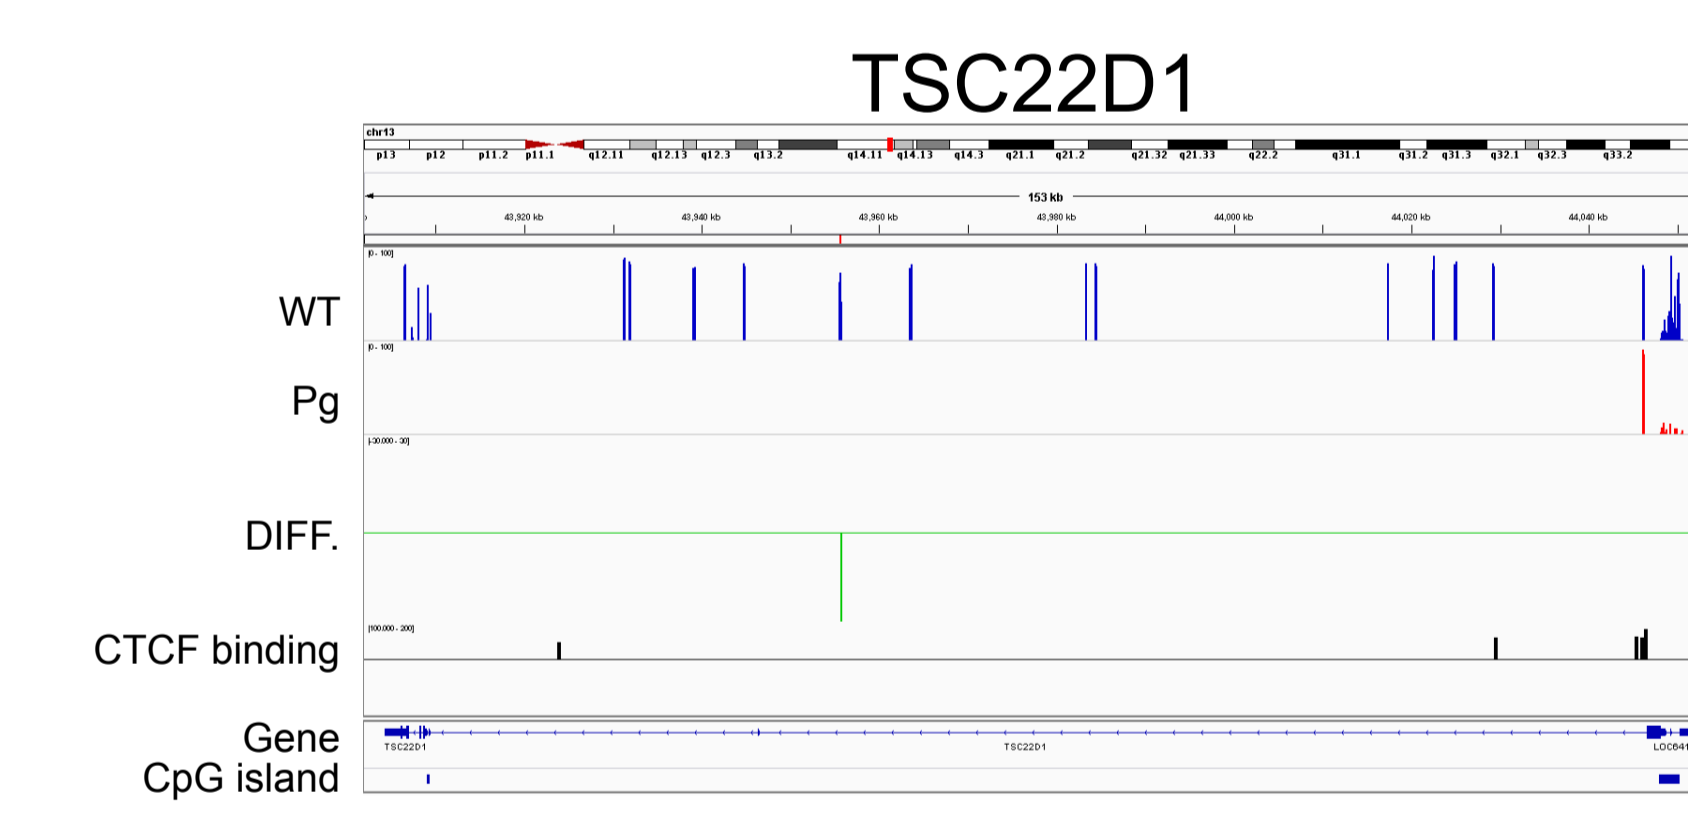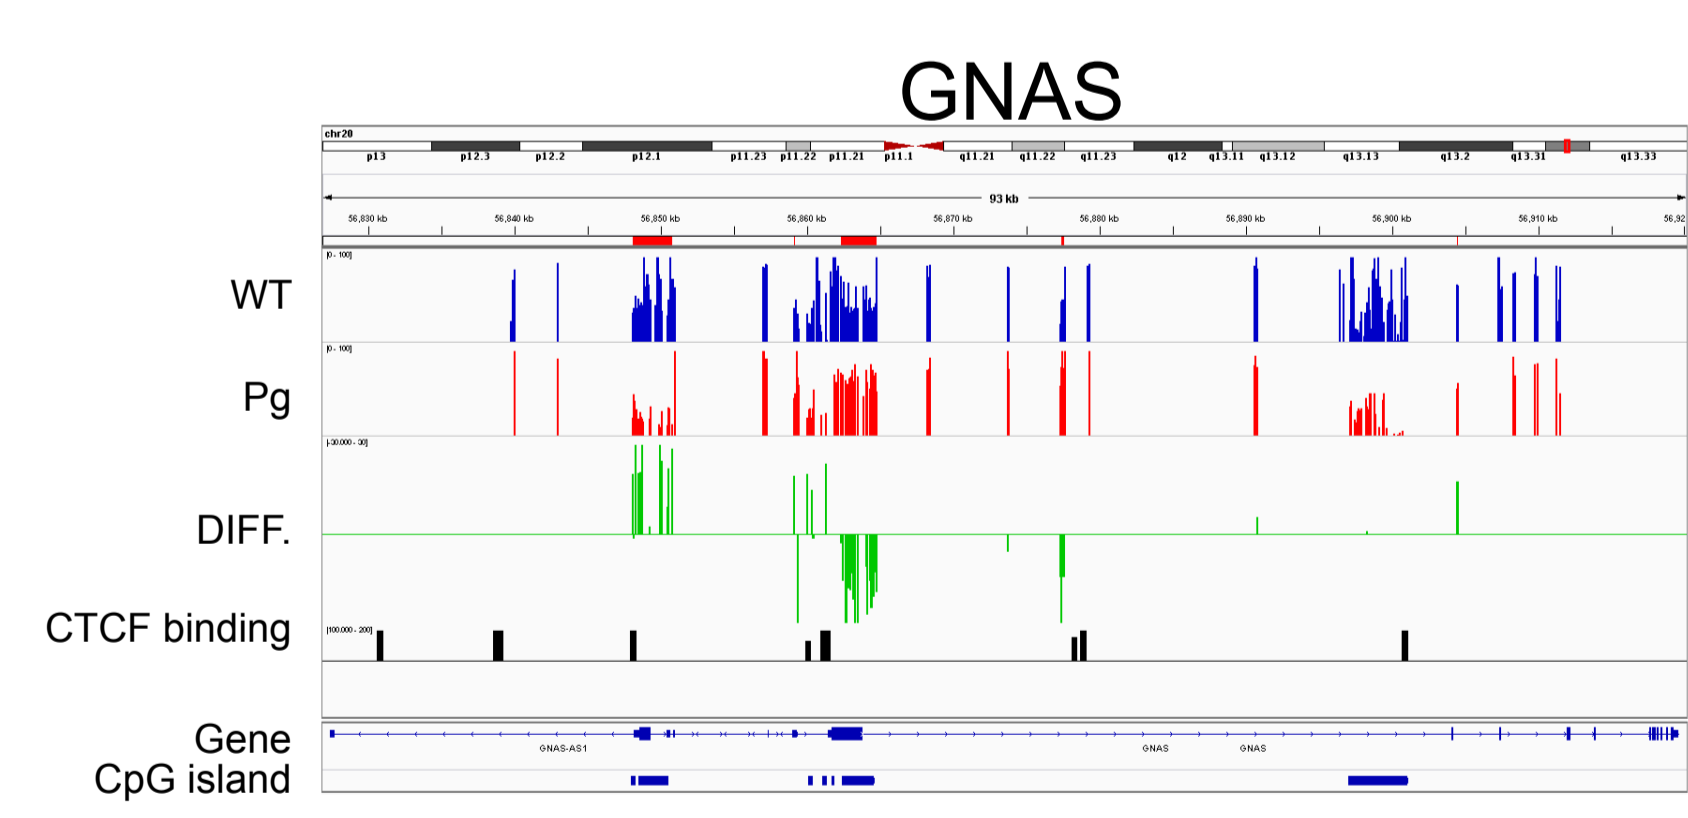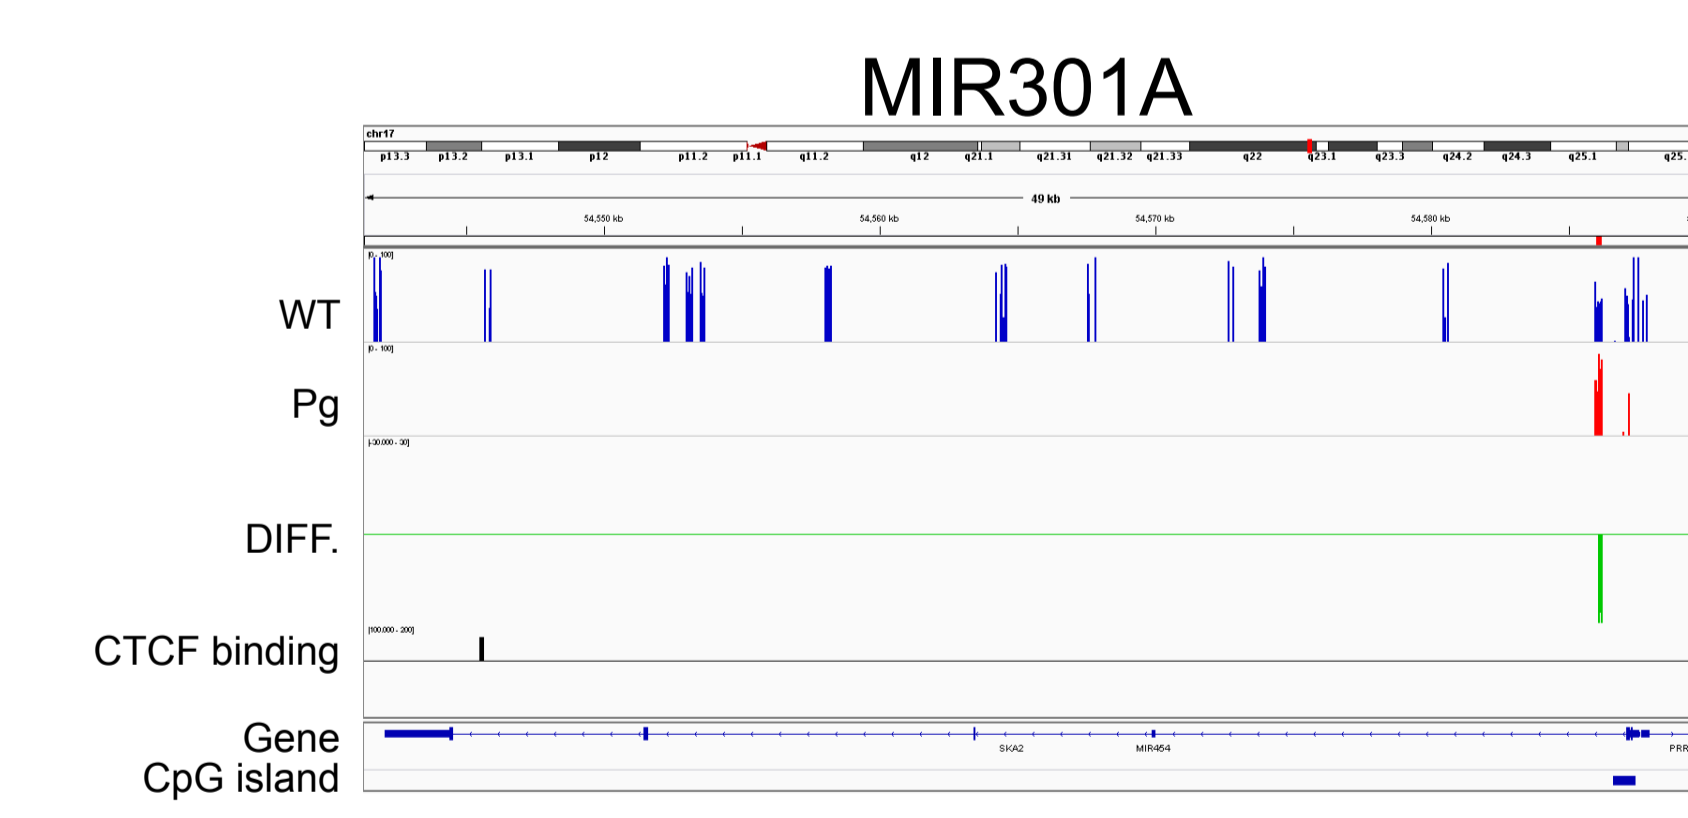

Figure S4

A.

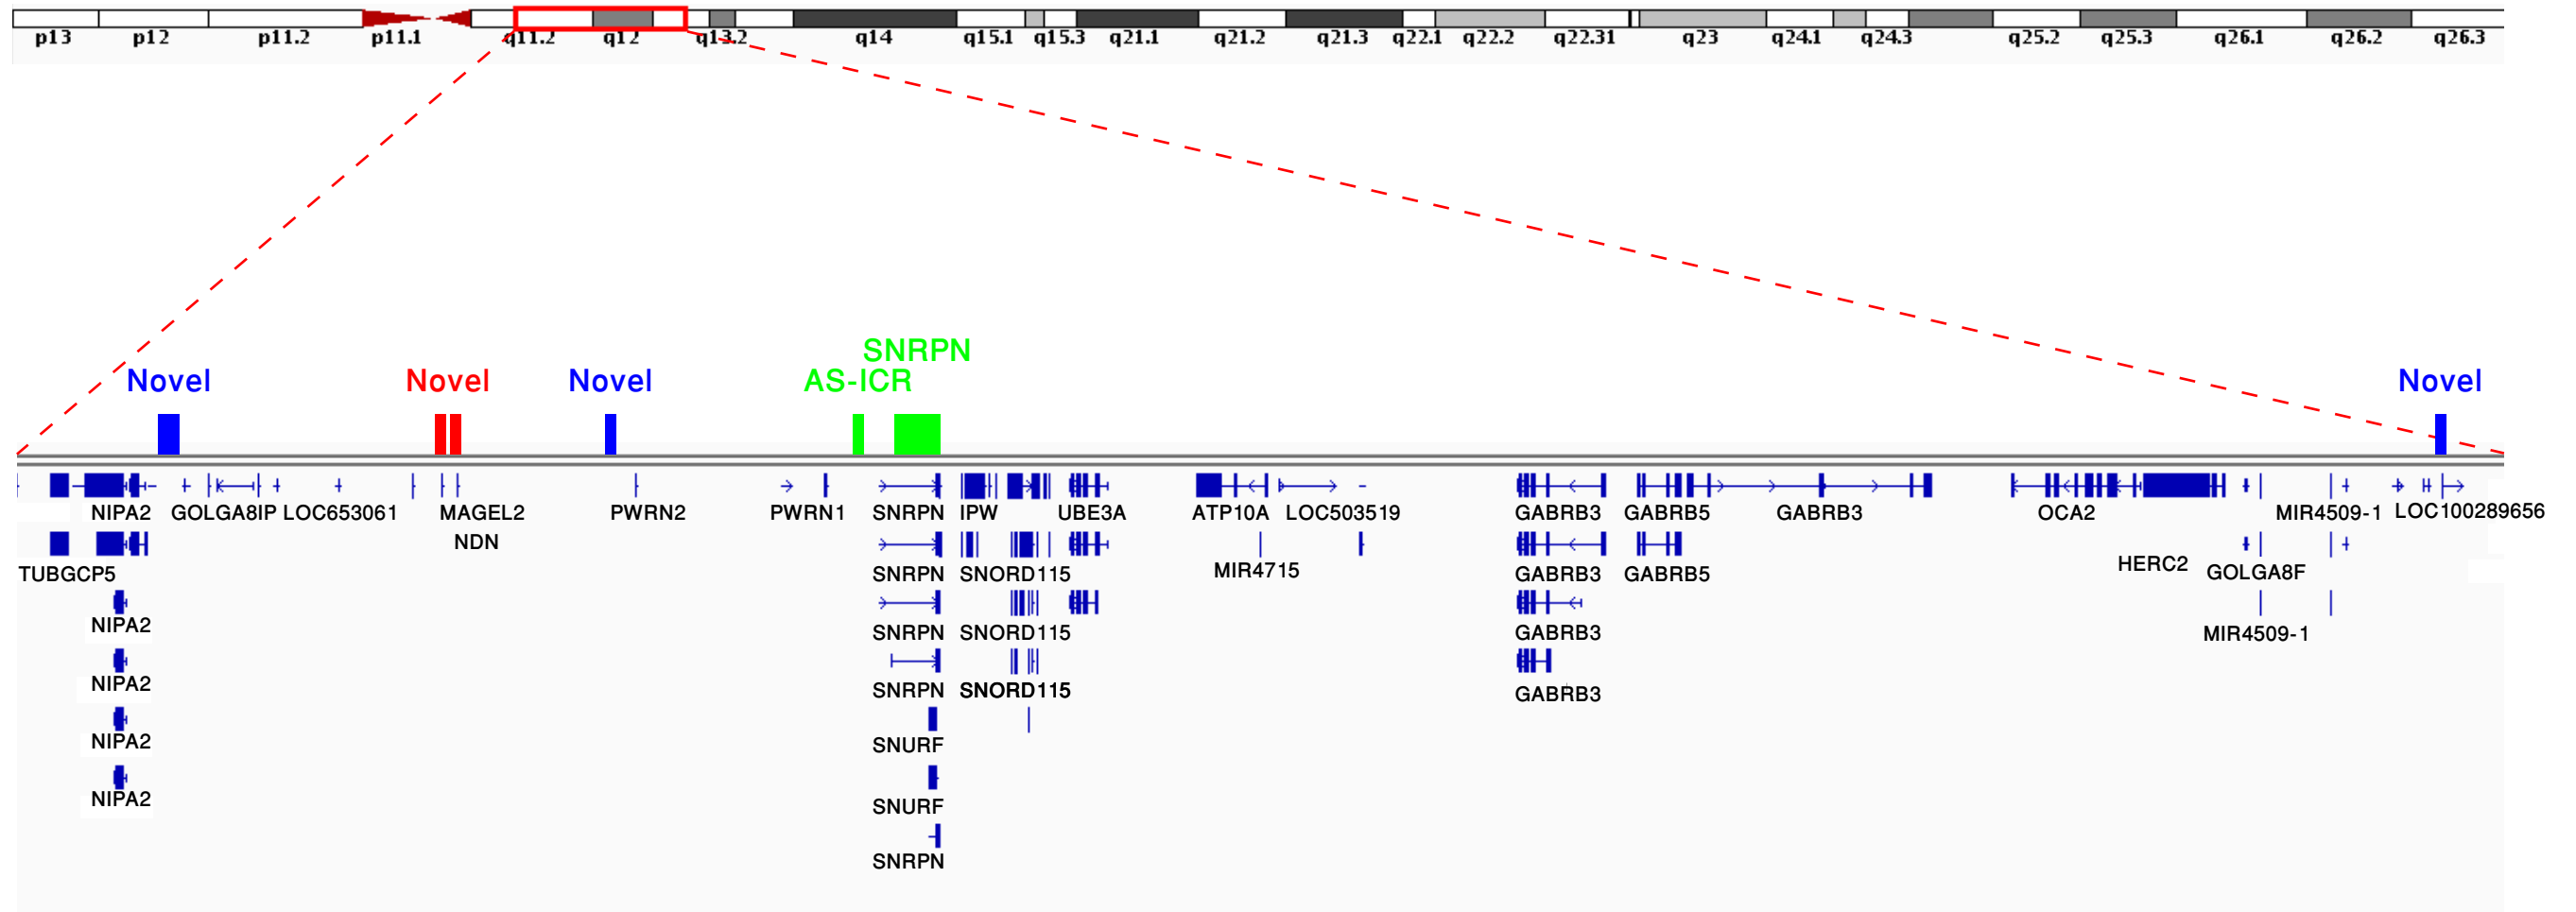

B.

Known DMRs (n=22)

■ Promoter ■ Intragenic ■ Intergenic

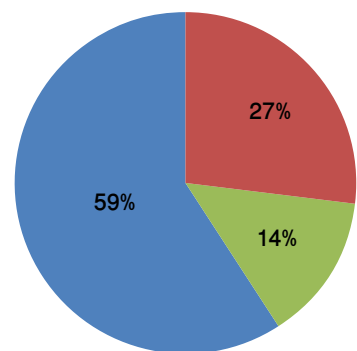

C.

Intergenic DMRs - Known

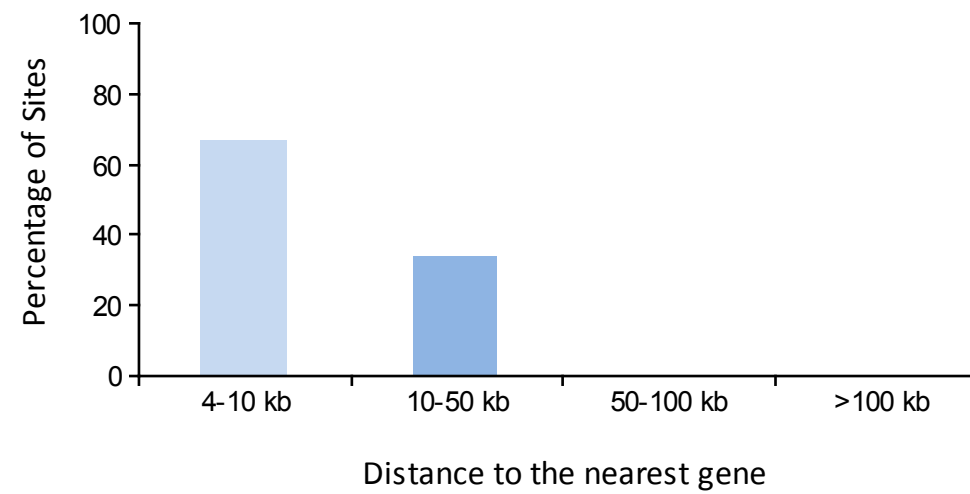

D.

Known DMRs (n=22)

■ Island CpG ■ Promoter ■ Non Island CpG

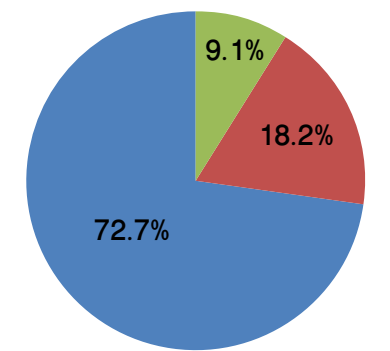

## Legends for Supplementary Figures

**Figure S1 - related to Figure 1.** Conceptual frame-work and analysis of reduced representation libraries. **(A)** Schematic representation of the conceptual frame-work used in this study. **(B)** Statistical analysis of reduced representation library read coverage; Pie chart indicating the number of individual CpG measured in each type of genomic region. Regions were calculated as previously described in Gu et. al. (Gu et al., 2011); shown are all parthenogenetic cell lines presented in this study.

**Figure S2 – related to Figure 1.** Characterization of global methylation profiles and known imprinted DMRs in different cell types. **(A)** Hierarchical clustering based on global DNA methylation profiles of HESCs, HiPSCs, PgHiPSCs, normal and parthenogenetic fibroblasts. **(B)** Distribution of DNA methylation in 12 low-passage (< passage 25) HESCs lines in known imprinted DMRs. **(C)** Average methylation calls  $\pm$  S.E of normal fibroblast cells in known imprinted DMRs. DMRs are ordered by chromosome numbers (X axis) **(D+E)** Average methylation calls  $\pm$  SD in different cell types representing **(D)** hyper-methylation in HiPSCs and several PgHiPSC lines in *PEG3* DMR and **(E)** hypo-methylation of several PgHiPSC lines in *GNAS* DMR following reprogramming. **(F)** Expression profile of genes associated with novel intra-genic and promoter DMRs; Shown is the ratio in RPKM between normal PSCs and PgHiPSCs.

**Figure S3 – related to Figure 2 and Table 1.** Regional view of all novel DMRs identified in this study. Average methylation values for wild type PSC (Blue) and PgHiPSCs (red) of all CpG calls. Green track indicates the difference between hemi-methylated wild type PSCs and PgHiPSCs CpGs. *CTCF* binding sites in H1 ES cells from the ENCODE project is depicted in Black and CpG islands (UCSC) in dark green.

**Figure S4 – related to Figure 3.** Characterization of previously identified imprinted DMRs. **(A)** Schematic representation of the genomic organization of all imprinted DMRs identified in the Prader-Willi/Angelman region in chromosome 15. pDMRs are depicted in blue rectangles; Red rectangles – mDMRs. The previously identified DMRs, *SNRPN* and Angelman syndrome imprinted control region (AS-ICR), are highlighted in green. **(B+C)** Characterization of previously identified imprinted

DMRs. **(B)** Pi-chart representing the different genomic properties of previously **(C)** Pi-chart representing the different genomic properties of the previously identified imprinted DMRs. identified imprinted DMRs. **(D)** Distribution of distances of the imprinted inter-genic DMRs to their nearest gene.

**Table S1**

Genes associated with intragenic DMRs

| Genes       | Ratio RPKM | PgHiPSCs (RPKM) | WT-HiPSCs (RPKM) |
|-------------|------------|-----------------|------------------|
| SNORD116-5  | 30.3       | 45.669          | 1385.773         |
| SNORD116-3  | 30.3       | 46.248          | 1401.206         |
| SNORD116-1  | 29.4       | 93.010          | 2738.360         |
| SNORD116-2  | 28.1       | 72.213          | 2032.450         |
| SNORD116-8  | 26.9       | 39.622          | 1067.274         |
| SNORD116-6  | 25.6       | 23.808          | 609.657          |
| SNORD116-24 | 25.4       | 37.492          | 951.107          |
| SNORD116-23 | 22.3       | 59.182          | 1316.893         |
| SNORD116-22 | 22.0       | 16.732          | 367.633          |
| SNORD116-16 | 21.8       | 23.106          | 503.020          |
| SNORD116-20 | 21.7       | 26.116          | 567.527          |
| PEG10       | 21.2       | 0.193           | 4.098            |
| SNORD116-15 | 21.1       | 22.929          | 484.401          |
| SNURF       | 19.9       | 5.635           | 112.060          |
| SNORD116-18 | 19.3       | 29.879          | 575.443          |
| SNORD116-11 | 18.6       | 23.505          | 436.349          |
| SNORD116-21 | 18.6       | 21.911          | 406.580          |
| IGF2        | 18.0       | 0.214           | 3.857            |
| SNORD116-17 | 17.3       | 14.541          | 251.079          |
| SNORD116-19 | 17.3       | 14.541          | 251.079          |
| SNORD116-29 | 16.9       | 39.941          | 675.126          |
| INS-IGF2    | 16.3       | 0.063           | 1.029            |
| SNORD116-25 | 16.3       | 18.326          | 298.937          |
| SNORD116-14 | 15.8       | 40.237          | 633.736          |
| SNORD116-4  | 15.6       | 14.132          | 220.532          |
| PAR5        | 15.0       | 2.907           | 43.676           |
| SNORD116-26 | 14.6       | 6.111           | 89.387           |
| SNORD116-27 | 13.4       | 25.098          | 337.319          |
| SNORD116-13 | 13.3       | 59.979          | 796.673          |
| SNRPN       | 13.2       | 0.554           | 7.310            |
| IPW         | 13.2       | 1.006           | 13.236           |
| SNORD107    | 12.2       | 16.038          | 195.453          |
| SNORD109A   | 12.0       | 8.295           | 99.409           |
| SNORD109A   | 12.0       | 8.295           | 99.409           |
| SNORD108    | 11.4       | 3.571           | 40.796           |
| MAGEL2      | 11.2       | 0.062           | 0.696            |
| NDN         | 10.2       | 0.828           | 8.407            |
| SNORD116-28 | 10.0       | 0.000           | 1004784500       |
| IGF2AS      | 5.2        | 0.036           | 0.188            |
| DIRAS3      | 4.5        | 0.399           | 1.804            |
| NAP1L5      | 4.4        | 0.238           | 1.049            |
| MIR301A     | 3.9        | 0.862           | 3.373            |
| KIAA1026    | 3.8        | 0.083           | 0.316            |
| ZDBF2       | 2.7        | 1.608           | 4.300            |
| DLK1        | 2.5        | 2.396           | 6.034            |
| TSC22D1     | 2.2        | 389.494         | 873.141          |
| TMEM51      | 2.2        | 0.264           | 0.574            |
| INPP5A      | 1.9        | 3.946           | 7.386            |
| ZNF322B     | 1.8        | 175.000         | 315.500          |
| GRB10       | 1.6        | 2.208           | 3.495            |
| SMG8        | 1.5        | 5.380           | 8.088            |



|          |     |        |        |
|----------|-----|--------|--------|
| GNAS     | 1.5 | 16.565 | 24.717 |
| COPG2    | 1.3 | 8.988  | 11.797 |
| TRIM37   | 1.3 | 2.589  | 3.365  |
| MEST     | 1.2 | 12.001 | 14.877 |
| EFHD2    | 1.1 | 9.300  | 10.475 |
| KCNQ1OT1 | 1.1 | 0.892  | 0.965  |
| INPP5F   | 1.1 | 9.901  | 10.580 |
| SKA2     | 1.0 | 4.204  | 4.125  |
| PPM1E    | 1.0 | 1.254  | 1.210  |
| CTSL2    | 0.7 | 69.819 | 51.091 |
| FLYWCH1  | 0.7 | 1.822  | 1.298  |
| TRAPPC9  | 0.5 | 2.650  | 1.445  |
| PRR11    | 0.5 | 17.604 | 9.521  |

Table S2

## Genes associated with intergenic DMRs

| Genes    | Ratio RPKM | PgHiPSCs (RPKM) | WT-HiPSCs (RPKM) |
|----------|------------|-----------------|------------------|
| ANKRD9   | 0.48       | 3.246           | 1.553            |
| APBA2    | 1.33       | 1.203           | 1.605            |
| CLTB     | 1.40       | 63.665          | 74.228           |
| CYFIP1   | 0.89       | 13.941          | 12.433           |
| DIO3     | 0.83       | 4.747           | 3.957            |
| FAF2     | 1.45       | 7.896           | 11.484           |
| GPRIN1   | 0.69       | 1.282           | 0.886            |
| HERC2P2  | 1.22       | 2.980           | 3.631            |
| HSP90AA1 | 0.92       | 217.467         | 199.550          |
| NDNL2    | 1.33       | 11.126          | 14.794           |
| NIPA1    | 1.05       | 2.580           | 2.721            |
| NIPA2    | 1.97       | 1.804           | 3.555            |
| OCA2     | 1.20       | 0.173           | 0.208            |
| PPP2R5C  | 0.90       | 11.607          | 10.458           |
| RNF44    | 1.27       | 11.547          | 14.664           |
| TJP1     | 1.16       | 8.323           | 9.636            |
| TSPAN17  | 1.33       | 2.688           | 3.563            |
| TUBGCP5  | 1.05       | 3.346           | 3.529            |
| UIMC1    | 0.89       | 5.705           | 5.051            |
| UNC5A    | 0.89       | 0.532           | 0.476            |
| WDR20    | 0.65       | 2.392           | 1.551            |
| ZNF346   | 1.07       | 3.511           | 3.745            |
| ZNF839   | 1.09       | 2.344           | 2.554            |

Table S3

Mouse Vs. Human

DMRs in mouse adopted from Xie et al. 2012

| Chromosome | Locus                          | Status in Mouse | Syntenly in Human | Same position of syntenly relative to gene | DMR in Human |
|------------|--------------------------------|-----------------|-------------------|--------------------------------------------|--------------|
| 1          | <i>Gpr1/Zdbf2</i>              | Known           | Yes               | Yes                                        | Yes          |
| 2          | <i>Mcts2/H13</i>               | Known           | Yes               | Yes                                        | No           |
| 2          | <i>H13</i> DMR2 (3' end)       | Novel           | Yes               | No                                         | No           |
| 2          | <i>Nesp</i>                    | Known           | Yes               | Yes                                        | Yes          |
| 2          | <i>Nespas/Gnasxl</i>           | Known           | Yes               | Yes                                        | Yes          |
| 2          | <i>Gnas1a</i>                  | Known           | Yes               | Yes                                        | Yes          |
| 6          | <i>Peg10/Sgce</i>              | Known           | Yes               | Yes                                        | Yes          |
| 6          | <i>Vwde</i> promoter           | Novel           | Yes               | Yes                                        | No           |
| 6          | <i>Mest (Peg1)</i>             | Known           | Yes               | Yes                                        | Yes          |
| 6          | <i>Herc3/Nap115</i>            | Known           | Yes               | Yes                                        | N/A          |
| 6          | <i>Casc1</i> intragenic        | Novel           | No                | -                                          | No           |
| 7          | <i>Peg3/Usp29</i>              | Known           | Yes               | Yes                                        | Yes          |
| 7          | 6330408a02Rik 3' end           | Novel           | Yes               | No                                         | No           |
| 7          | <i>Snurf/Snrpn</i>             | Known           | Yes               | Yes                                        | Yes          |
| 7          | <i>Snrpn</i> U exon            | Novel           | No                | -                                          | No           |
| 7          | <i>U80893</i> 5' upstream      | Novel           | No                | -                                          | No           |
| 7          | <i>mir344b</i>                 | Novel           | No                | -                                          | No           |
| 7          | <i>mir344c</i>                 | Novel           | No                | -                                          | No           |
| 7          | <i>mir344</i>                  | Novel           | No                | -                                          | No           |
| 7          | <i>mir344-2</i>                | Novel           | No                | -                                          | No           |
| 7          | <i>mir344g</i>                 | Novel           | No                | -                                          | No           |
| 7          | <i>AK086712</i> promoter       | Novel           | Yes               | Yes                                        | No           |
| 7          | <i>Ndn</i>                     | Known           | Yes               | Yes                                        | Yes          |
| 7          | <i>Magel2</i>                  | Known           | Yes               | Yes                                        | Yes          |
| 7          | <i>Magel2-Mrkn3</i> intergenic | Novel           | No                | -                                          | No           |
| 7          | <i>Mkrn3</i>                   | Known           | Yes               | Yes                                        | No           |
| 7          | <i>Peg12</i>                   | Known           | Yes               | Yes                                        | No           |
| 7          | <i>Inpp5f</i>                  | Known           | No                | -                                          | Yes          |
| 7          | <i>H19</i> promoter            | Known           | Yes               | Yes                                        | Yes          |
| 7          | <i>H19</i> ICR                 | Known           | Yes               | Yes                                        | Yes          |
| 7          | <i>igf2</i> DMR                | Known           | Yes               | Yes                                        | Yes          |
| 7          | <i>Kcnq1ot1</i>                | Known           | Yes               | Yes                                        | Yes          |
| 7          | <i>Cdkn1c</i>                  | Known           | Yes               | Yes                                        | No           |
| 7          | <i>Cdkn1c</i> upstream         | Known           | Yes               | No                                         | No           |
| 9          | <i>Rasgrf1</i>                 | Known           | Yes               | Yes                                        | N/A          |
| 10         | <i>Plagl1</i>                  | Known           | Yes               | Yes                                        | Yes          |
| 10         | <i>Neurog3</i> upstream        | Novel           | Yes               | Yes                                        | N/A          |
| 11         | <i>Grb10</i>                   | Known           | Yes               | Yes                                        | Yes          |
| 11         | <i>Grb10</i> DMR2 (intragenic) | Novel           | Yes               | Yes                                        | N/A          |
| 11         | <i>Zrsr1/Comm1</i>             | Known           | Yes               | No                                         | No           |
| 11         | <i>Comm1</i> DMR2 (intragenic) | Novel           | No                | -                                          | No           |
| 11         | <i>FR149454</i> promoter       | Novel           | No                | -                                          | No           |
| 12         | <i>FR085584</i> promoter       | Novel           | Yes               | Yes                                        | No           |
| 12         | <i>DIK1</i>                    | Known           | Yes               | Yes                                        | No           |
| 12         | <i>DIK1-Gtl2</i> IG            | Known           | Yes               | Yes                                        | Yes          |
| 12         | <i>Gtl2</i>                    | Known           | Yes               | Yes                                        | Yes          |
| 12         | <i>Gtl2-Mirg</i> diffuse DMR   | Novel           | Yes               | Yes                                        | No           |
| 13         | <i>Nhlrc1</i> downstream       | Novel           | Yes               | No                                         | No           |
| 15         | <i>Myo10</i> intragenic        | Novel           | Yes               | Yes                                        | No           |
| 15         | <i>Pvt1</i> promoter           | Novel           | Yes               | Yes                                        | N/A          |
| 15         | <i>Peg13/Trappc9</i>           | Known           | Yes               | Yes                                        | Yes          |
| 15         | <i>Eif2c2</i> diffuse DMR      | Novel           | Yes               | Yes                                        | No           |
| 15         | <i>Slc38a4</i>                 | Known           | Yes               | No                                         | No           |
| 17         | <i>Airn/Igf2r</i>              | Known           | No                | No                                         | No           |
| 17         | <i>Igf2r</i>                   | Known           | Yes               | Yes                                        | No           |
| 18         | <i>Impact</i>                  | Known           | Yes               | Yes                                        | No           |

Human Specific Vs. Mouse

Human Specific DMRs

| Chromosome | Locus                      | Status in Human | Syntenly in Mouse | Same position of syntenly relative to gene |
|------------|----------------------------|-----------------|-------------------|--------------------------------------------|
| 1          | TMEM51                     | Novel           | Yes               | Yes                                        |
| 1          | NBPF1,NBPF10,NBPF20,NBPF14 | Novel           | No                | -                                          |
| 1          | NBPF1,NBPF10,NBPF20,NBPF15 | Novel           | No                | -                                          |
| 5          | TSPAN17,UNC5A              | Novel           | Yes               | Yes                                        |
| 7          | TMEM176A,TMEM176B          | Novel           | Yes               | Yes                                        |
| 9          | RCL1                       | Novel           | No                | -                                          |
| 9          | ZNF322B                    | Novel           | Yes               | No                                         |
| 10         | INPP5A                     | Novel           | No                | -                                          |
| 11         | TH,ASCL2                   | Novel           | No                | -                                          |
| 13         | TSC22D1                    | Novel           | Yes               | Yes                                        |
| 14         | DIO3                       | Novel           | No                | -                                          |
| 15         | WHAMMP3,NIPA1,NIPA2        | Novel           | Yes               | No                                         |
| 15         | PWRN2                      | Novel           | No                | -                                          |
| 15         | LOC100289656               | Novel           | Yes               | No                                         |
| 16         | NAT15,ZNF597               | Known           | Yes               | Yes                                        |
| 16         | FLYWCH1                    | Novel           | No                | -                                          |
| 17         | FAM33A,SKA2,MIR301A,PRP11  | Novel           | Yes               | Yes                                        |
| 20         | BLCAP,NNAT                 | Known           | Yes               | Yes                                        |
| 20         | TOX2,GTSF1L,MYBL2          | Novel           | Yes               | Yes                                        |
| 20         | GNAS                       | Novel           | Yes               | Yes                                        |
